# Supplementary material for: Unraveling the palindromic and nonpalindromic motifs of retroviral integration site sequences by statistical mixture models
Source: HighWire-hosted journal article supplement (doi:10.1101/gr.277694.123), 2023-07-18

## Supplemental list of sequence logos

This file presents KLID-base sequence logos of complete mixtures generated throughout the study. Shown are KLID-based sequence logos for two to eight-component mixtures (M02 to M08). The file is divided into two parts:

### Part 1: mixture component logo for virus-representative (pages 2 - 10)

Component sequence logos of representative IS mixtures for HIV, HTLV, MLV, MVV, PFV, PFV, and ASLV. IS sets used for the mixture estimations are named in following table:

| Virus | Cells       | #IS    | Publication                 |
|-------|-------------|--------|-----------------------------|
| HTLV  | Jurkat      | 4521   | Kirk et al. 2016            |
| HIV   | Jurkat      | 161470 | Zhyvoloup et al. 2017       |
| MLV   | Human CD34+ | 57991  | De Ravin et al. 2014        |
| MVV   | HEK293T     | 411721 | Ballandras-Colas et al 2022 |
| PFV   | HT1080      | 55384  | Lesbats et al. 2017         |
| ASLV  | CEF         | 2096   | Malhotra et al. 2017        |

### Part 2: Comparing mixture components for HIV and HTLV IS data sets (pages 11 - 19)

Side-by-side comparison of estimated mixtures of experimentally independent IS sets representing similar viruses. Data sets used are named in the following table:

| Virus | Cells                  | #IS    | Publication           |
|-------|------------------------|--------|-----------------------|
| HTLV  | Jurkat                 | 4521   | Kirk et al. 2016      |
| HTLV  | patient PBMC           | 162760 | Melamed et al. 2022   |
| HTLV  | cell culture (various) | 235150 | Melamed et al. 2022   |
| HIV   | Jurkat                 | 161470 | Zhyvoloup et al. 2017 |
| HIV   | SupT1                  | 16803  | Vansant et al. 2020   |
| HIV   | patient PBMC           | 22225  | Melamed et al. 2022   |
| HIV   | cell culture (various) | 33081  | Melamed et al. 2022   |

## Part 1

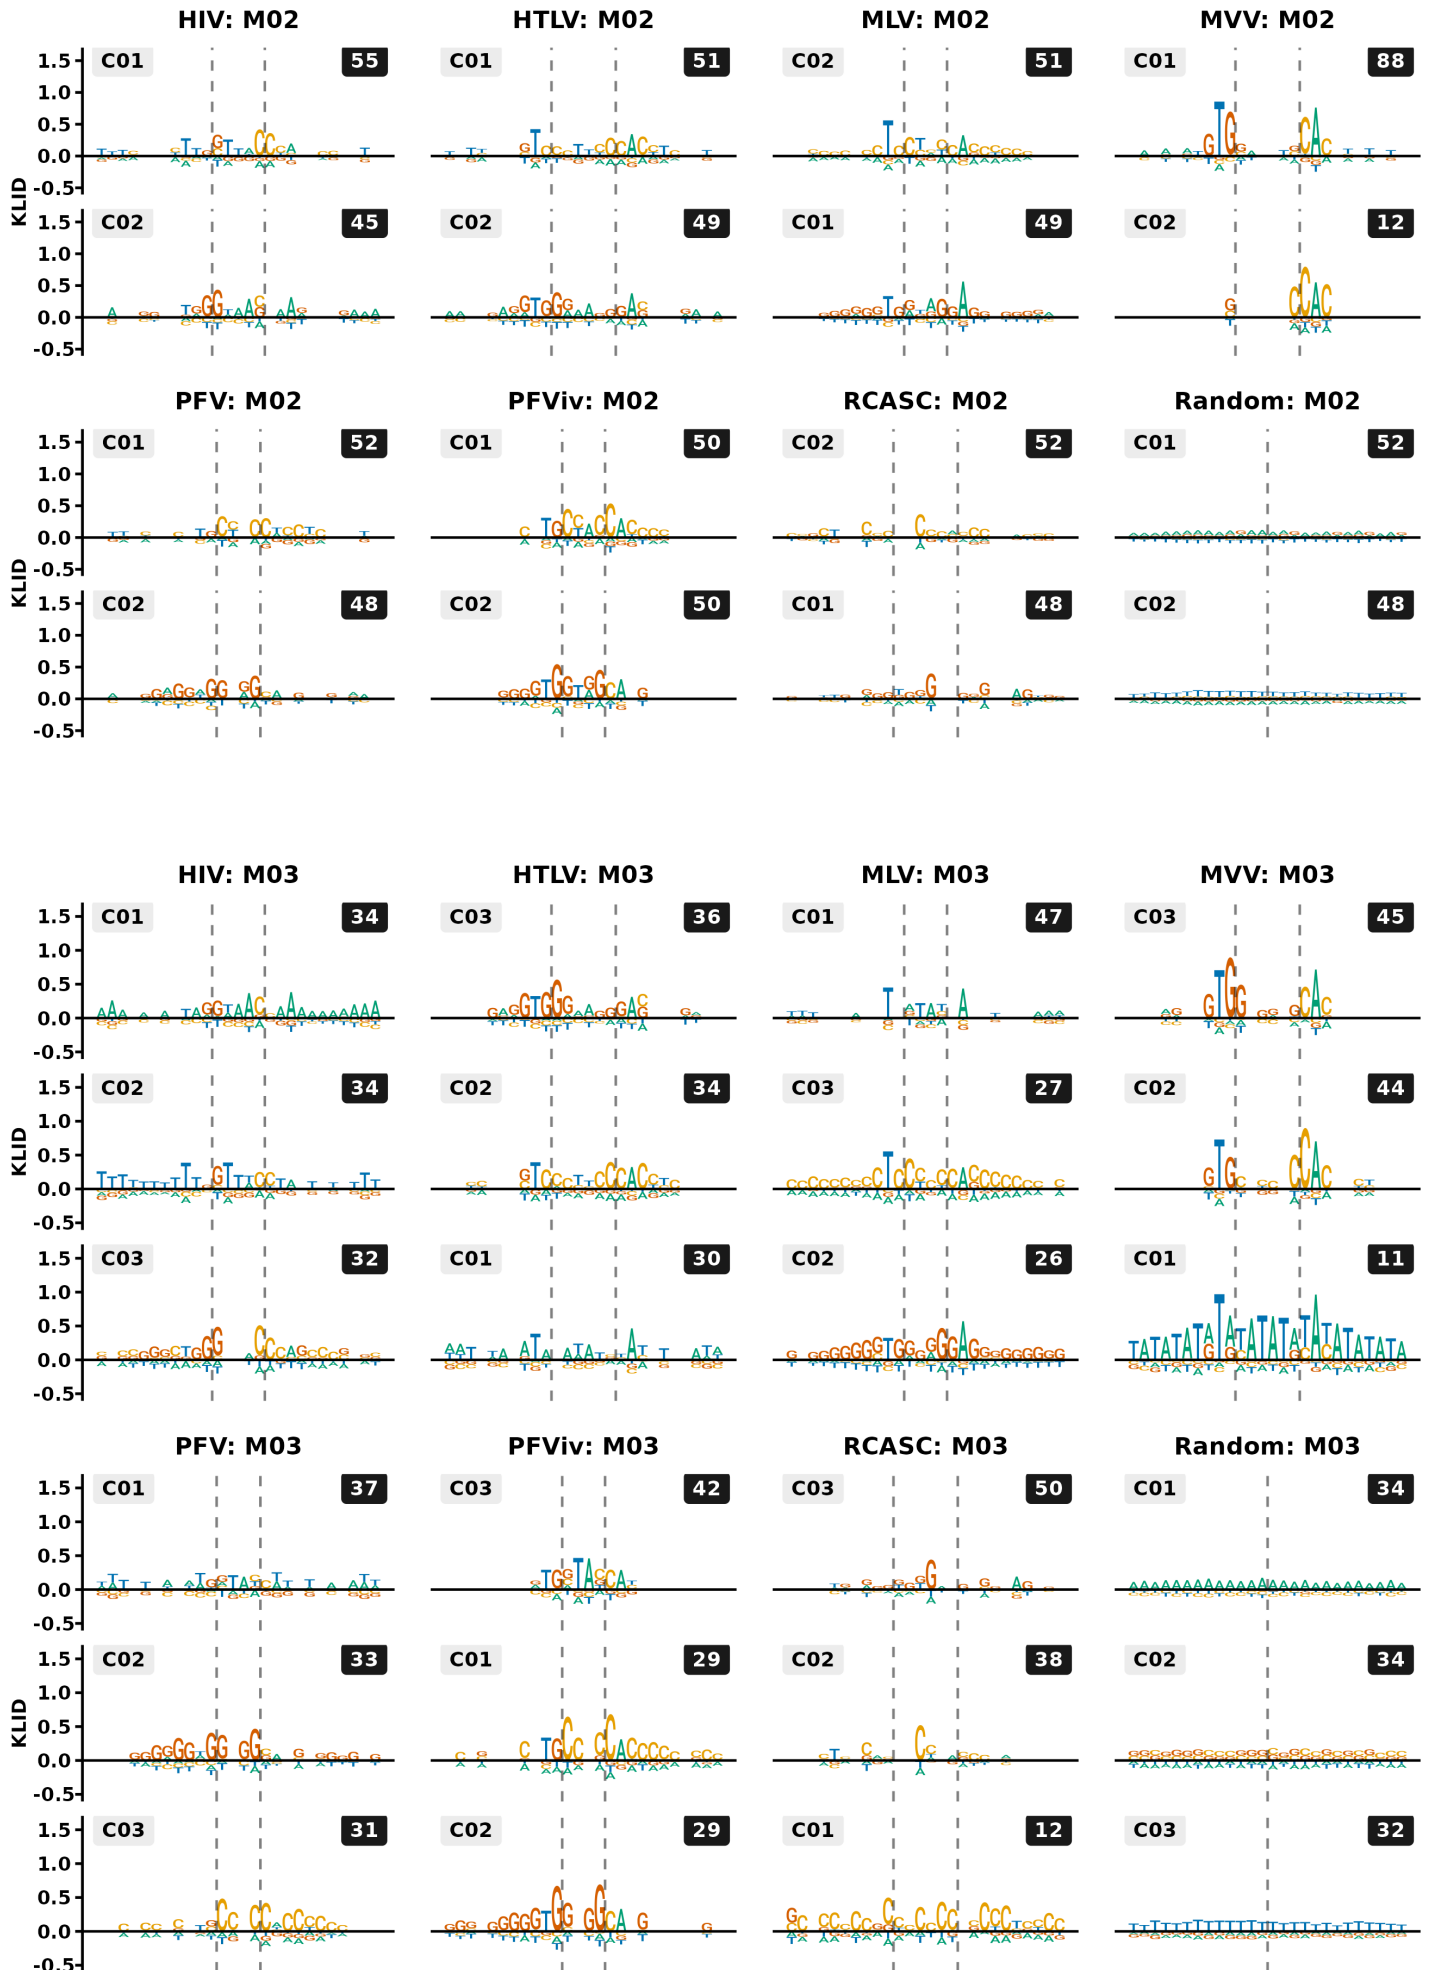

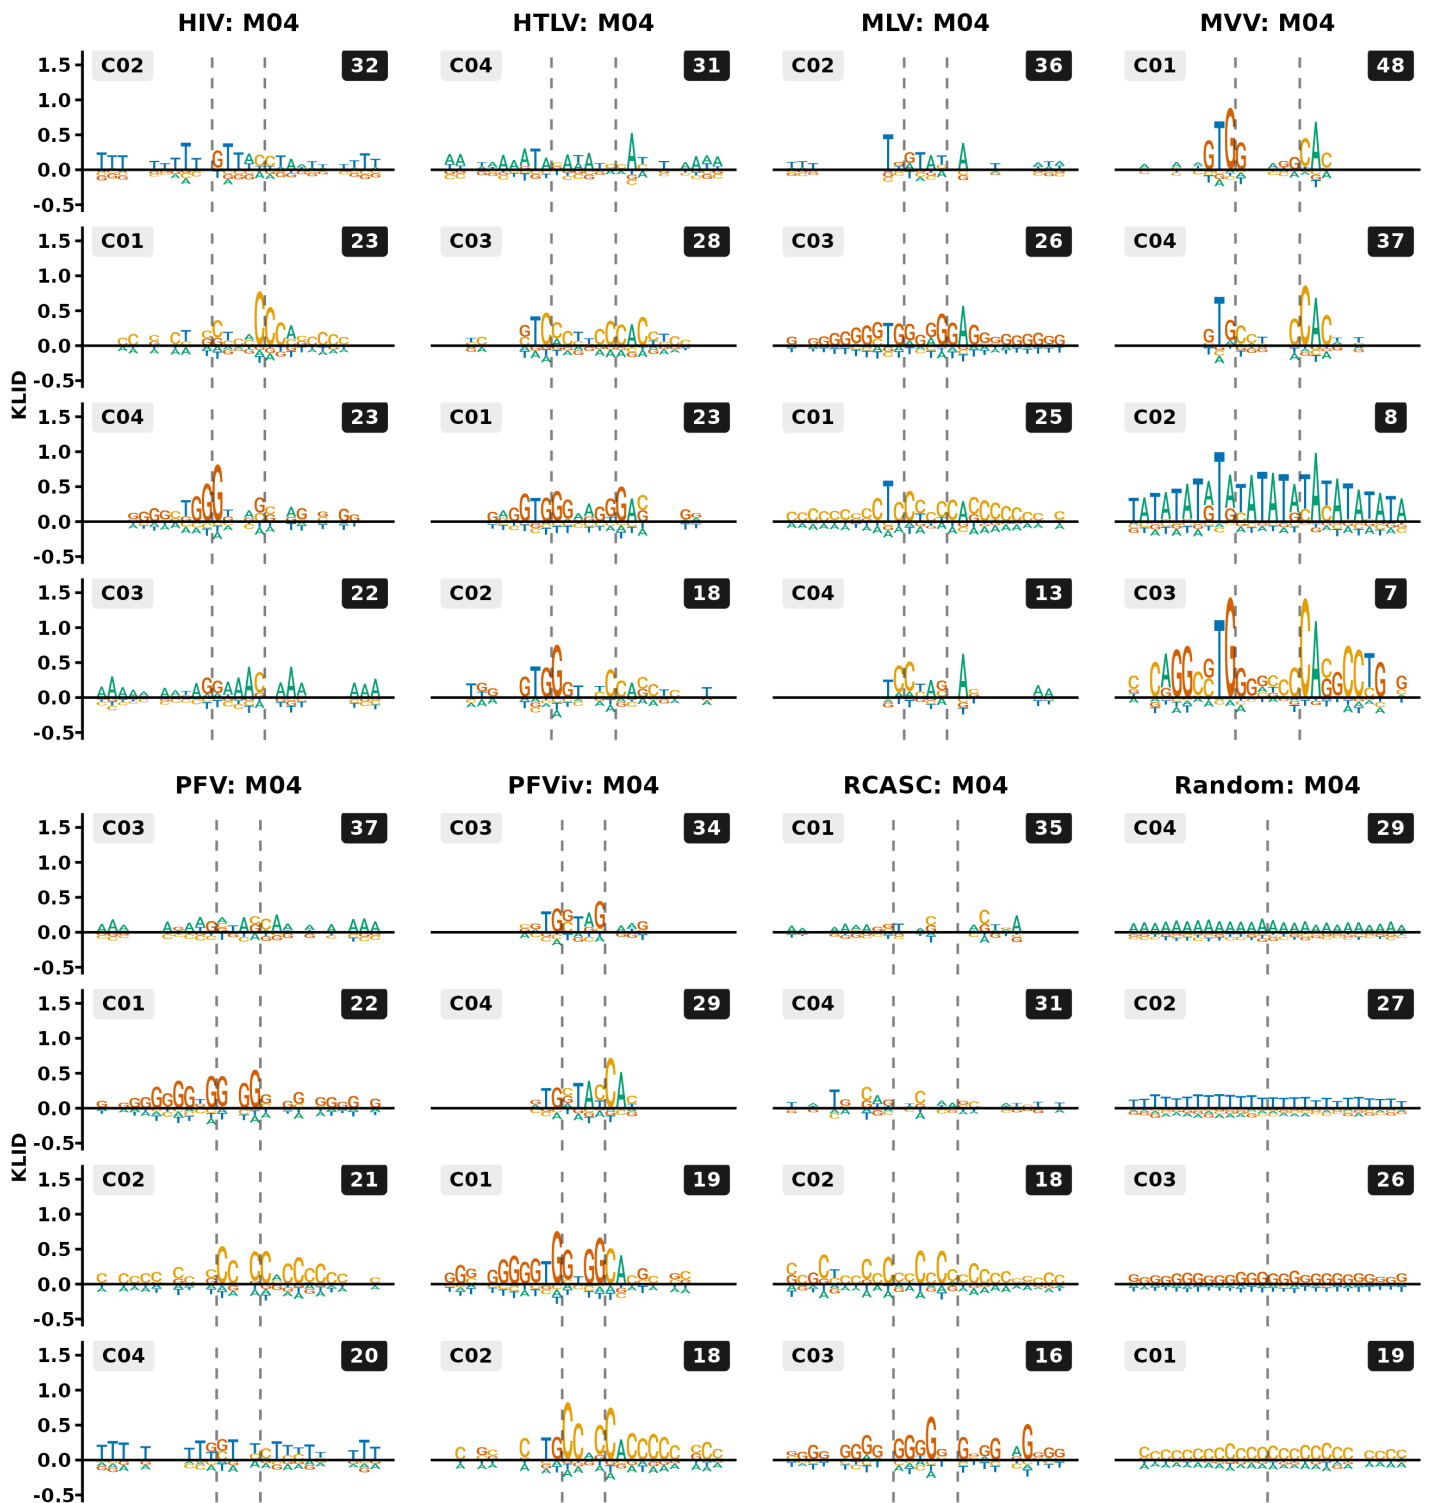

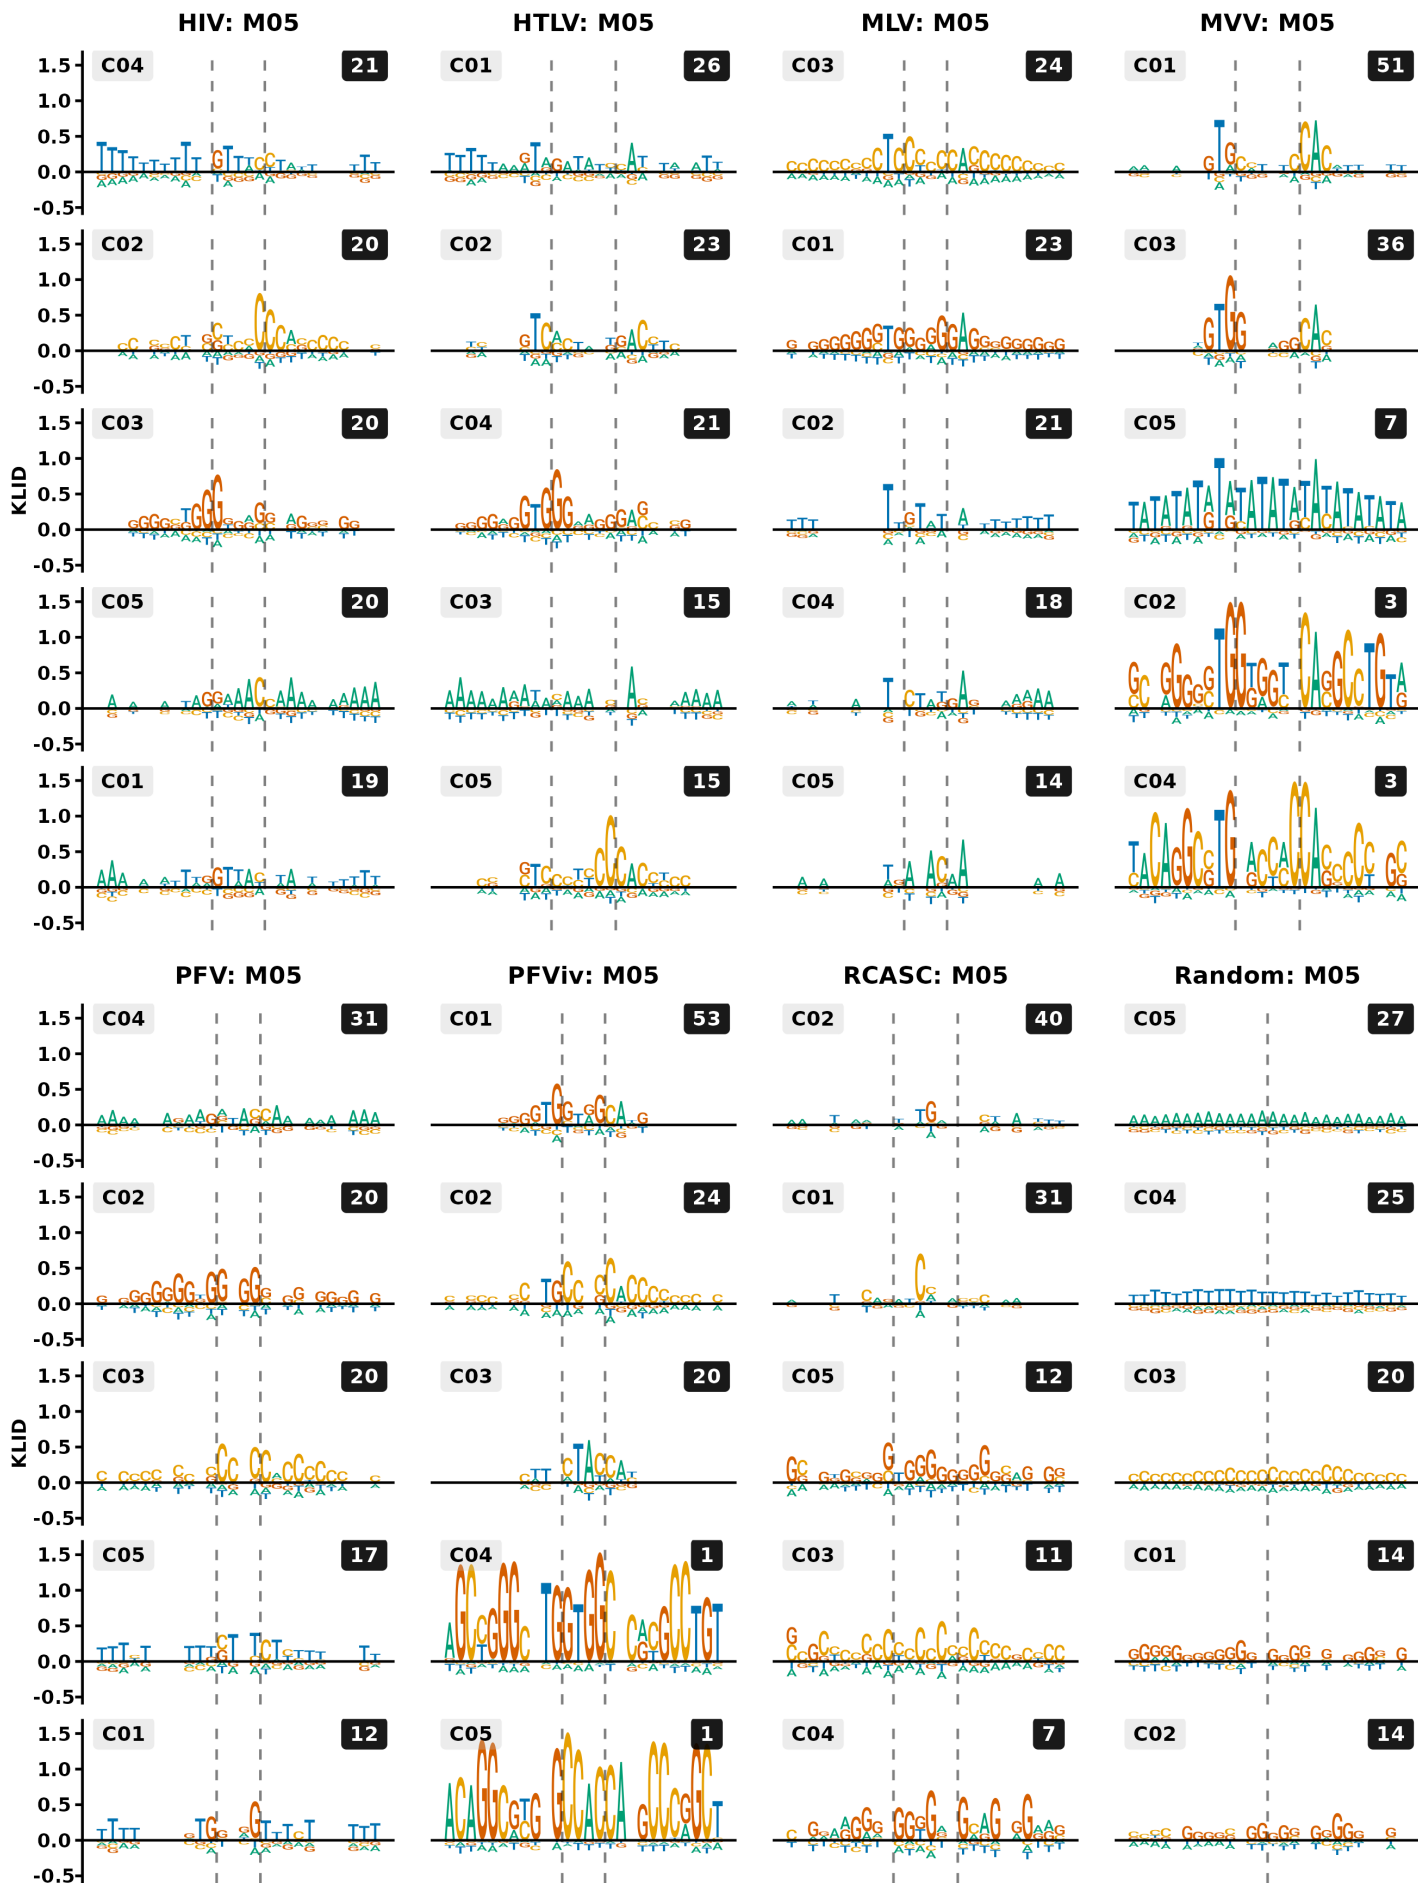



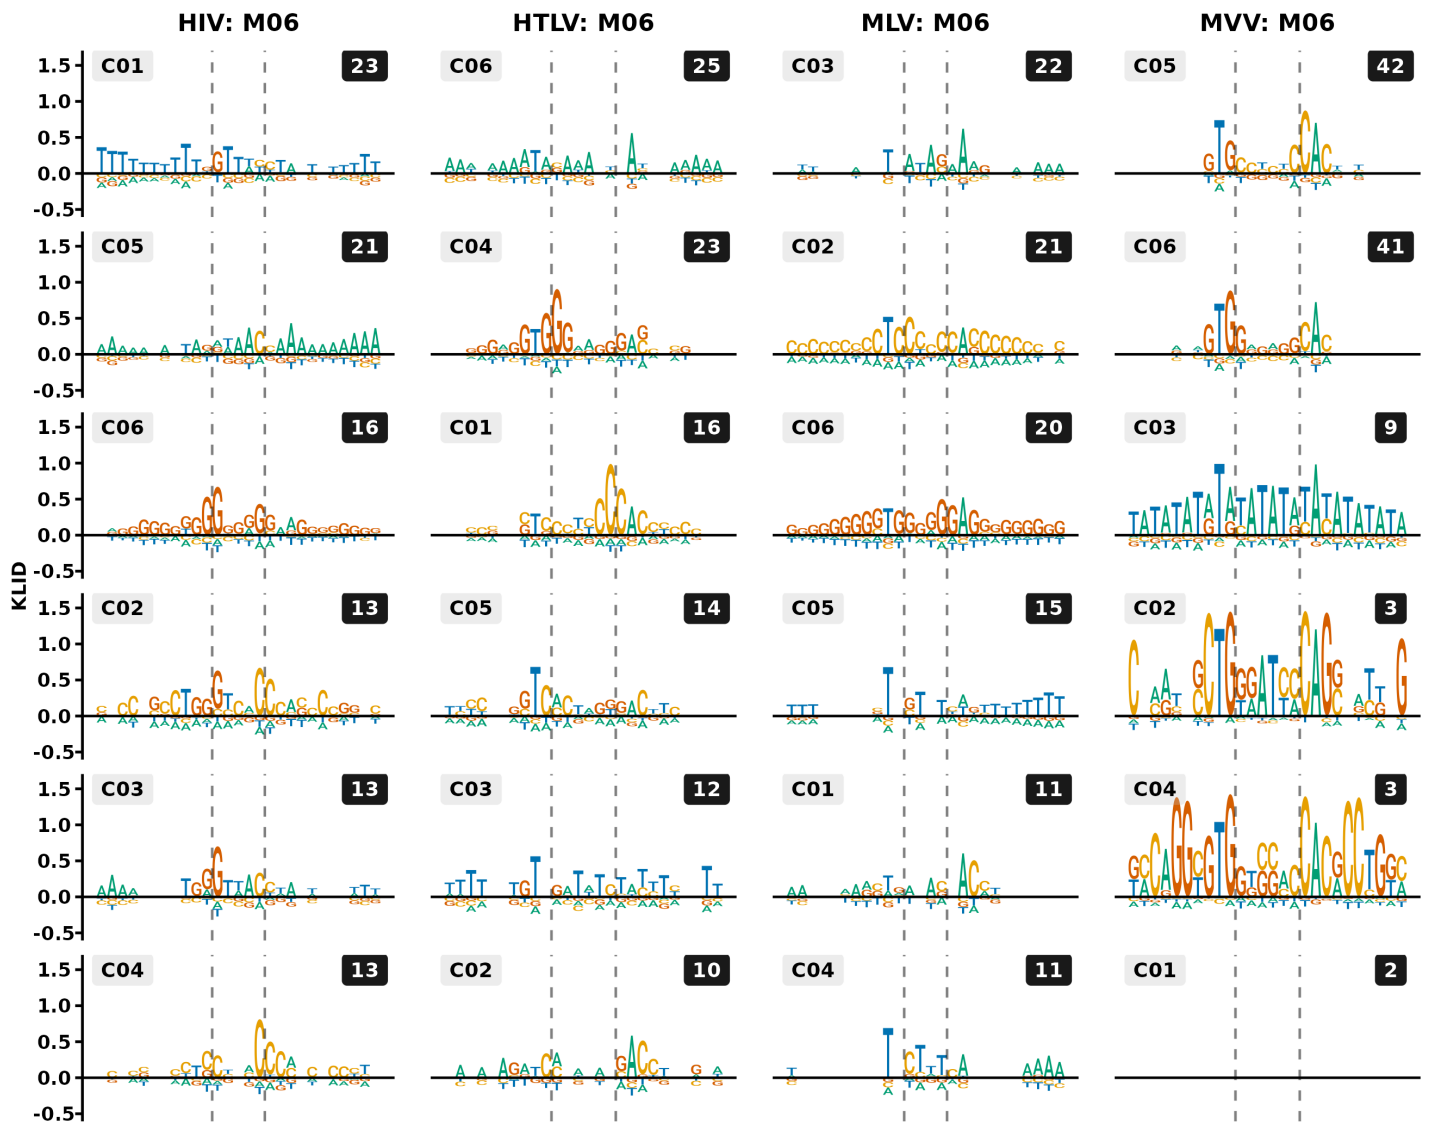

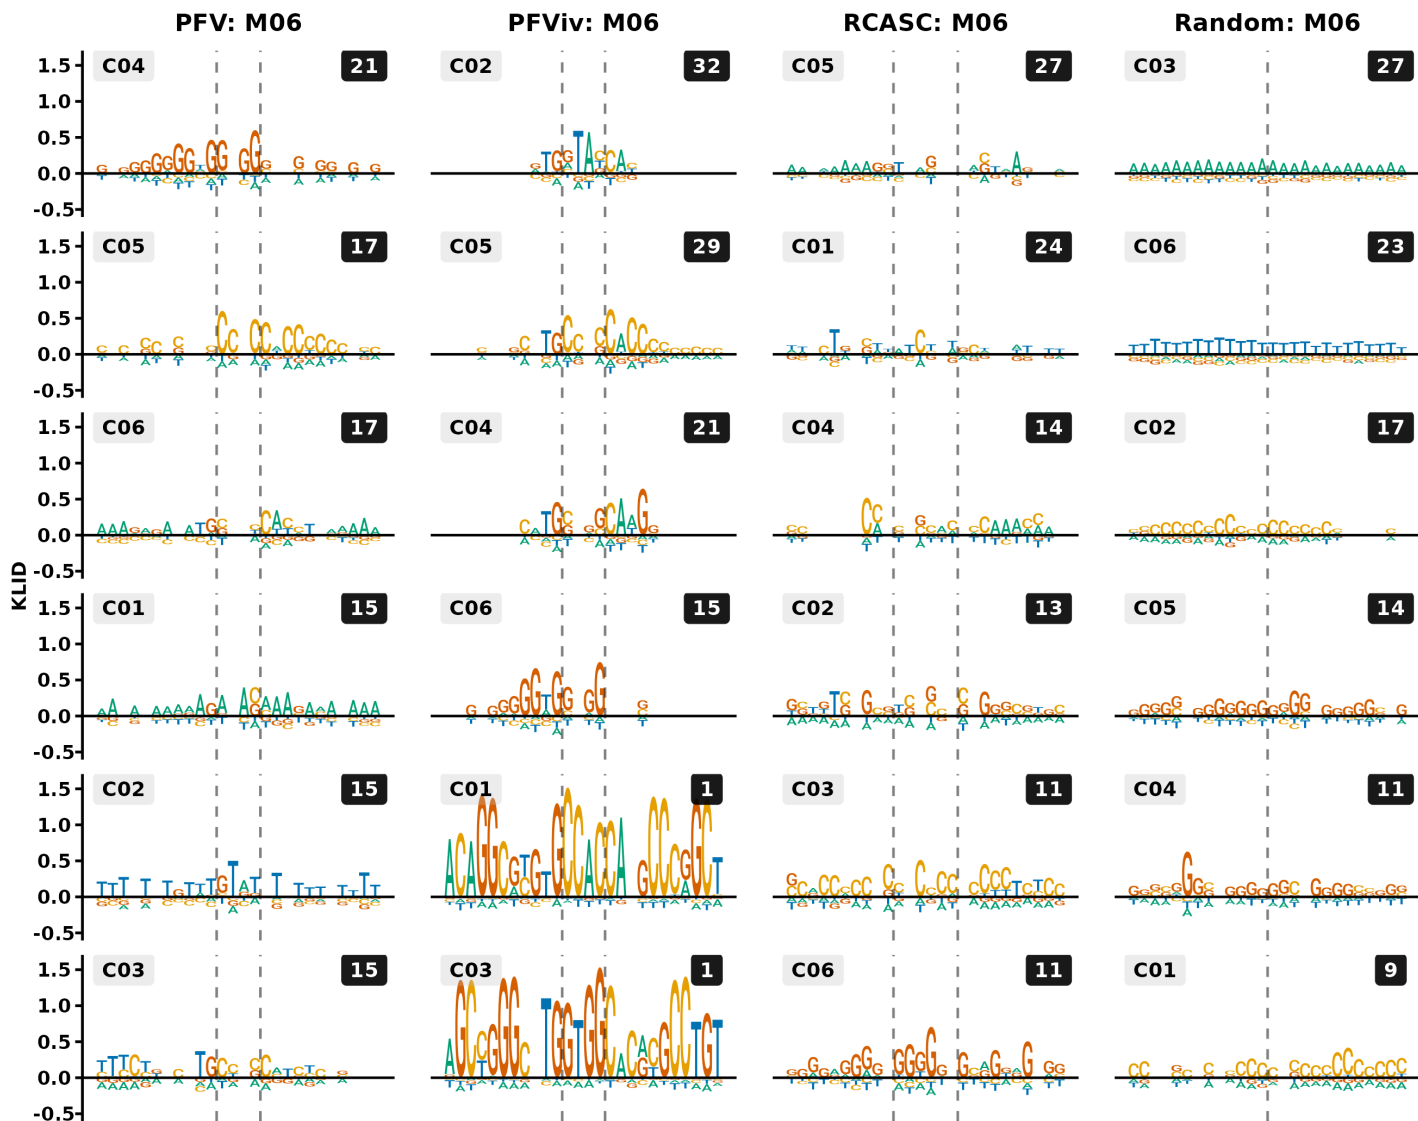

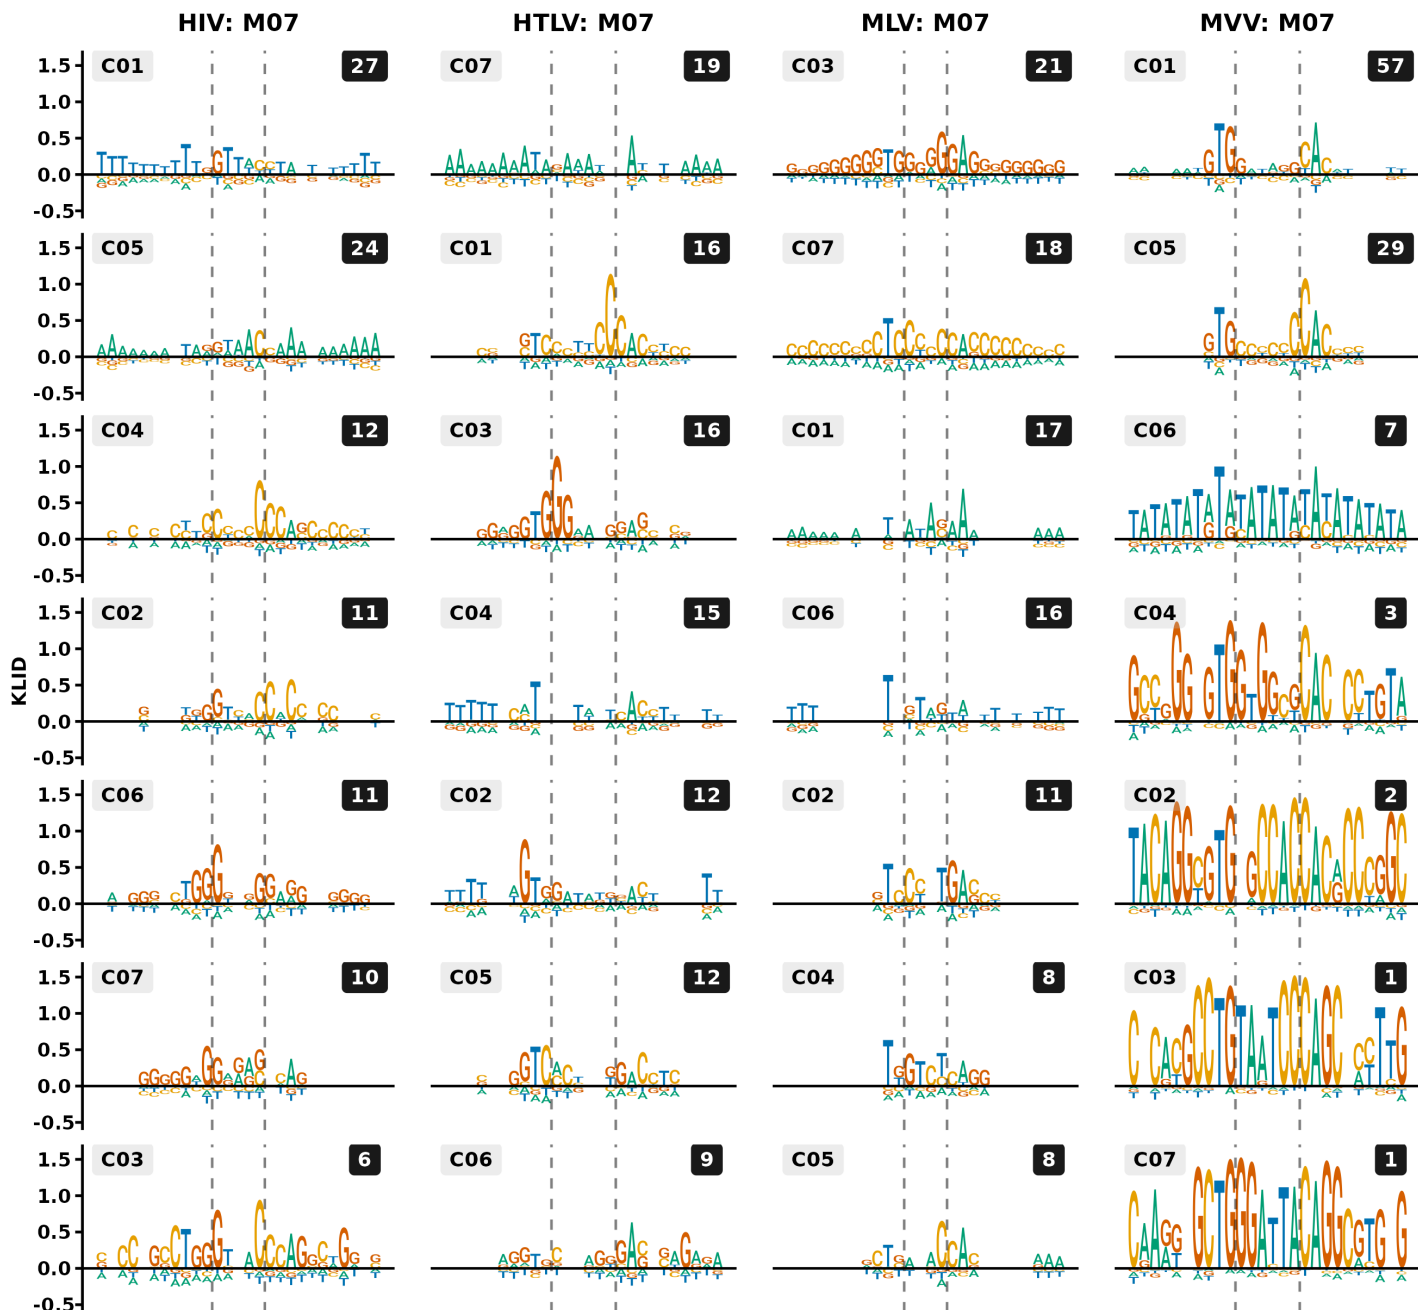

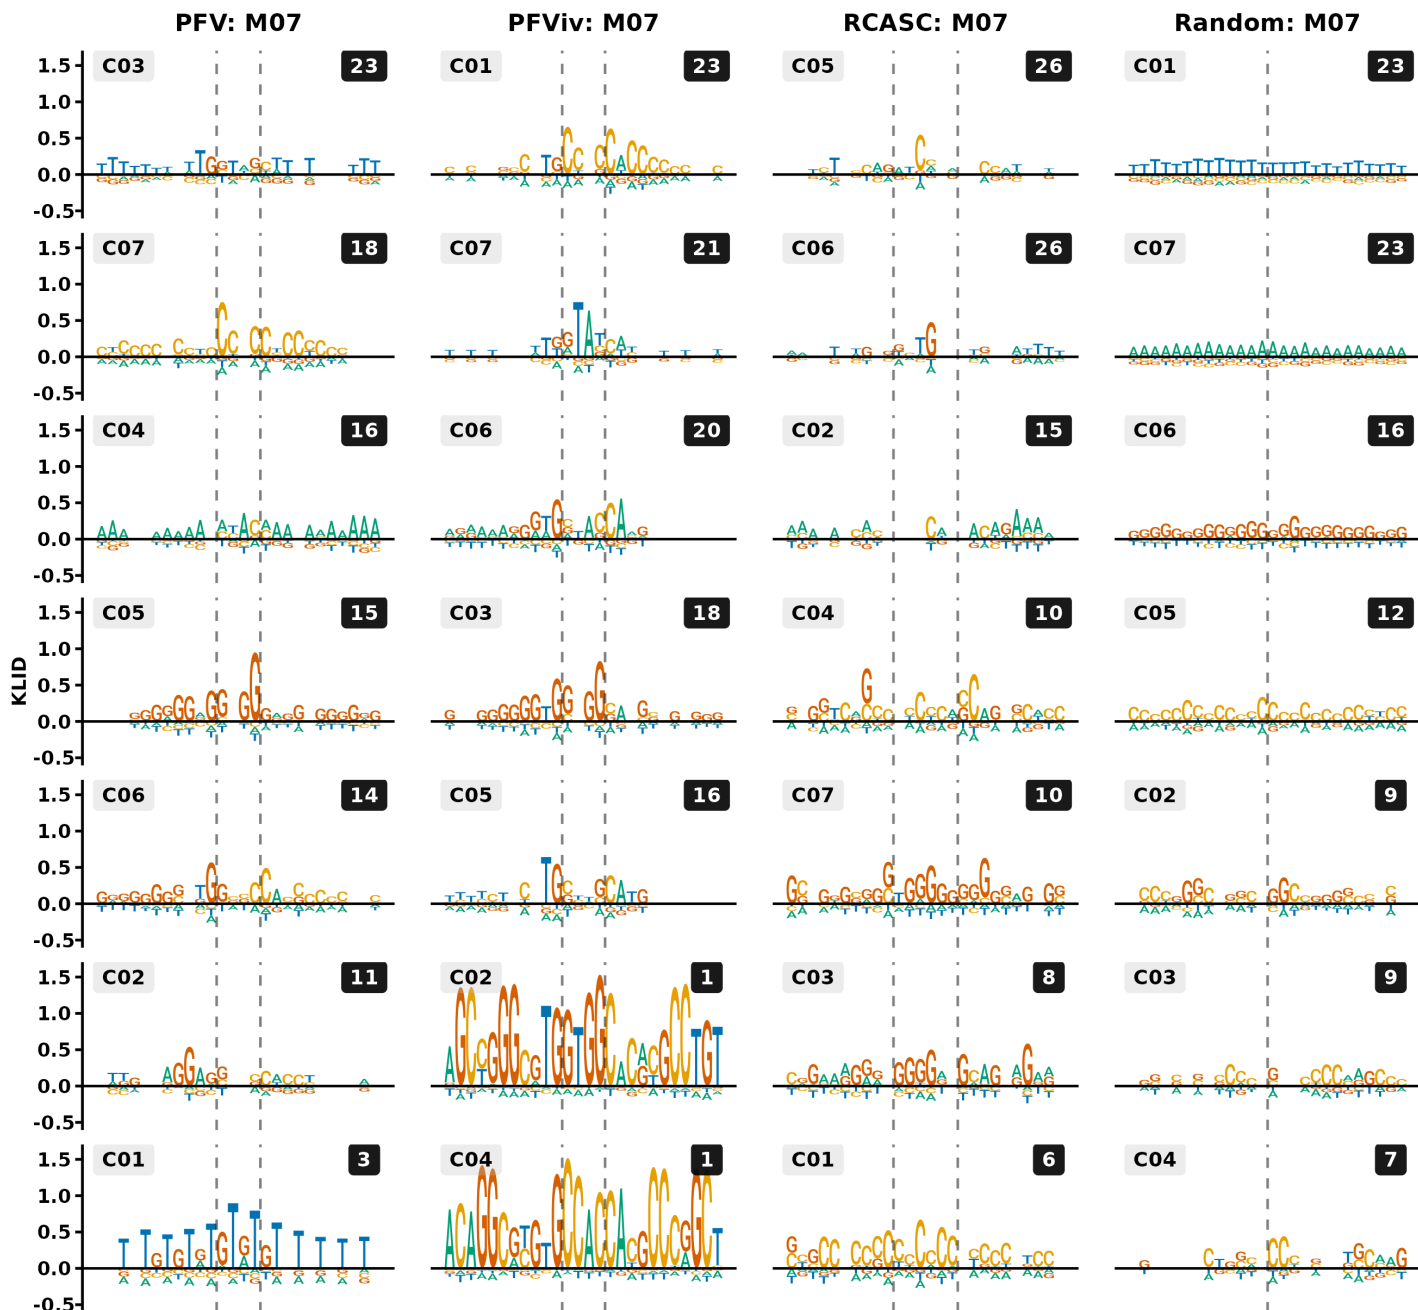

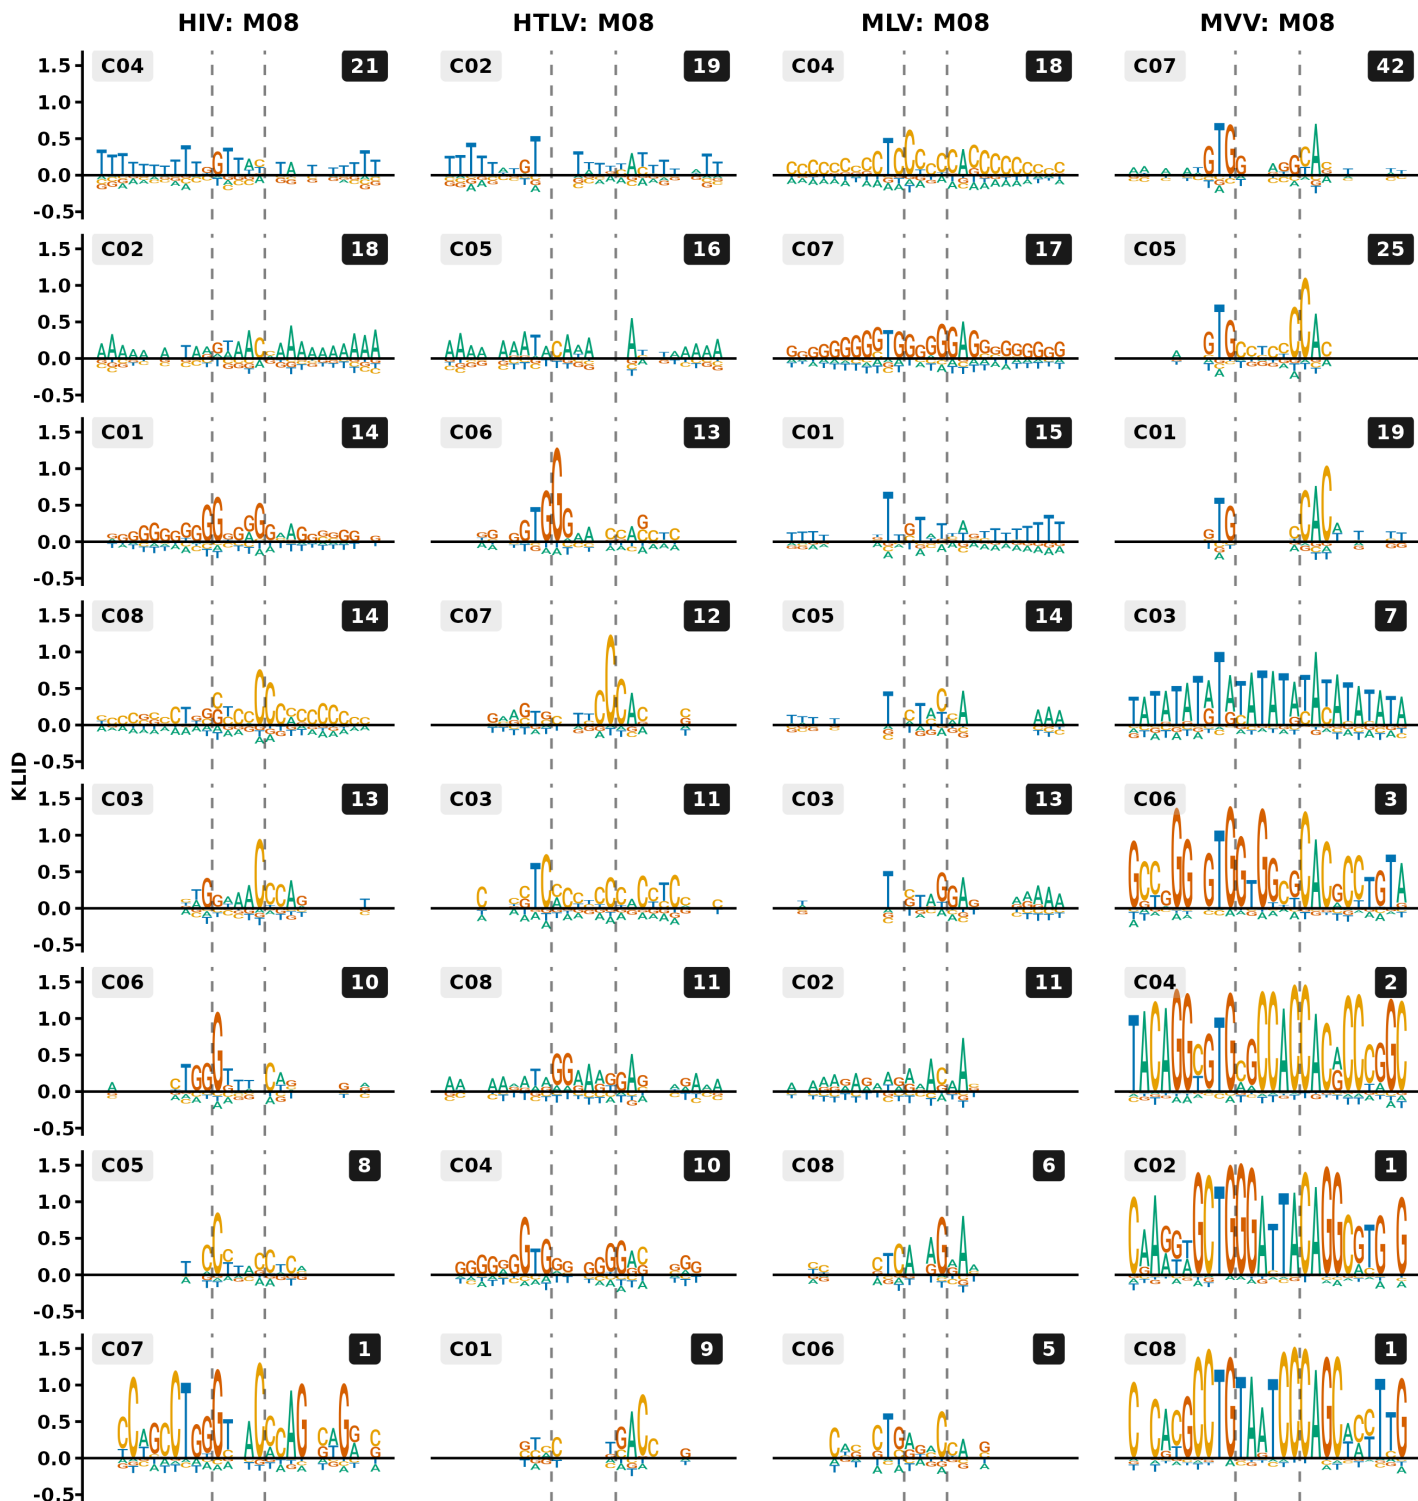

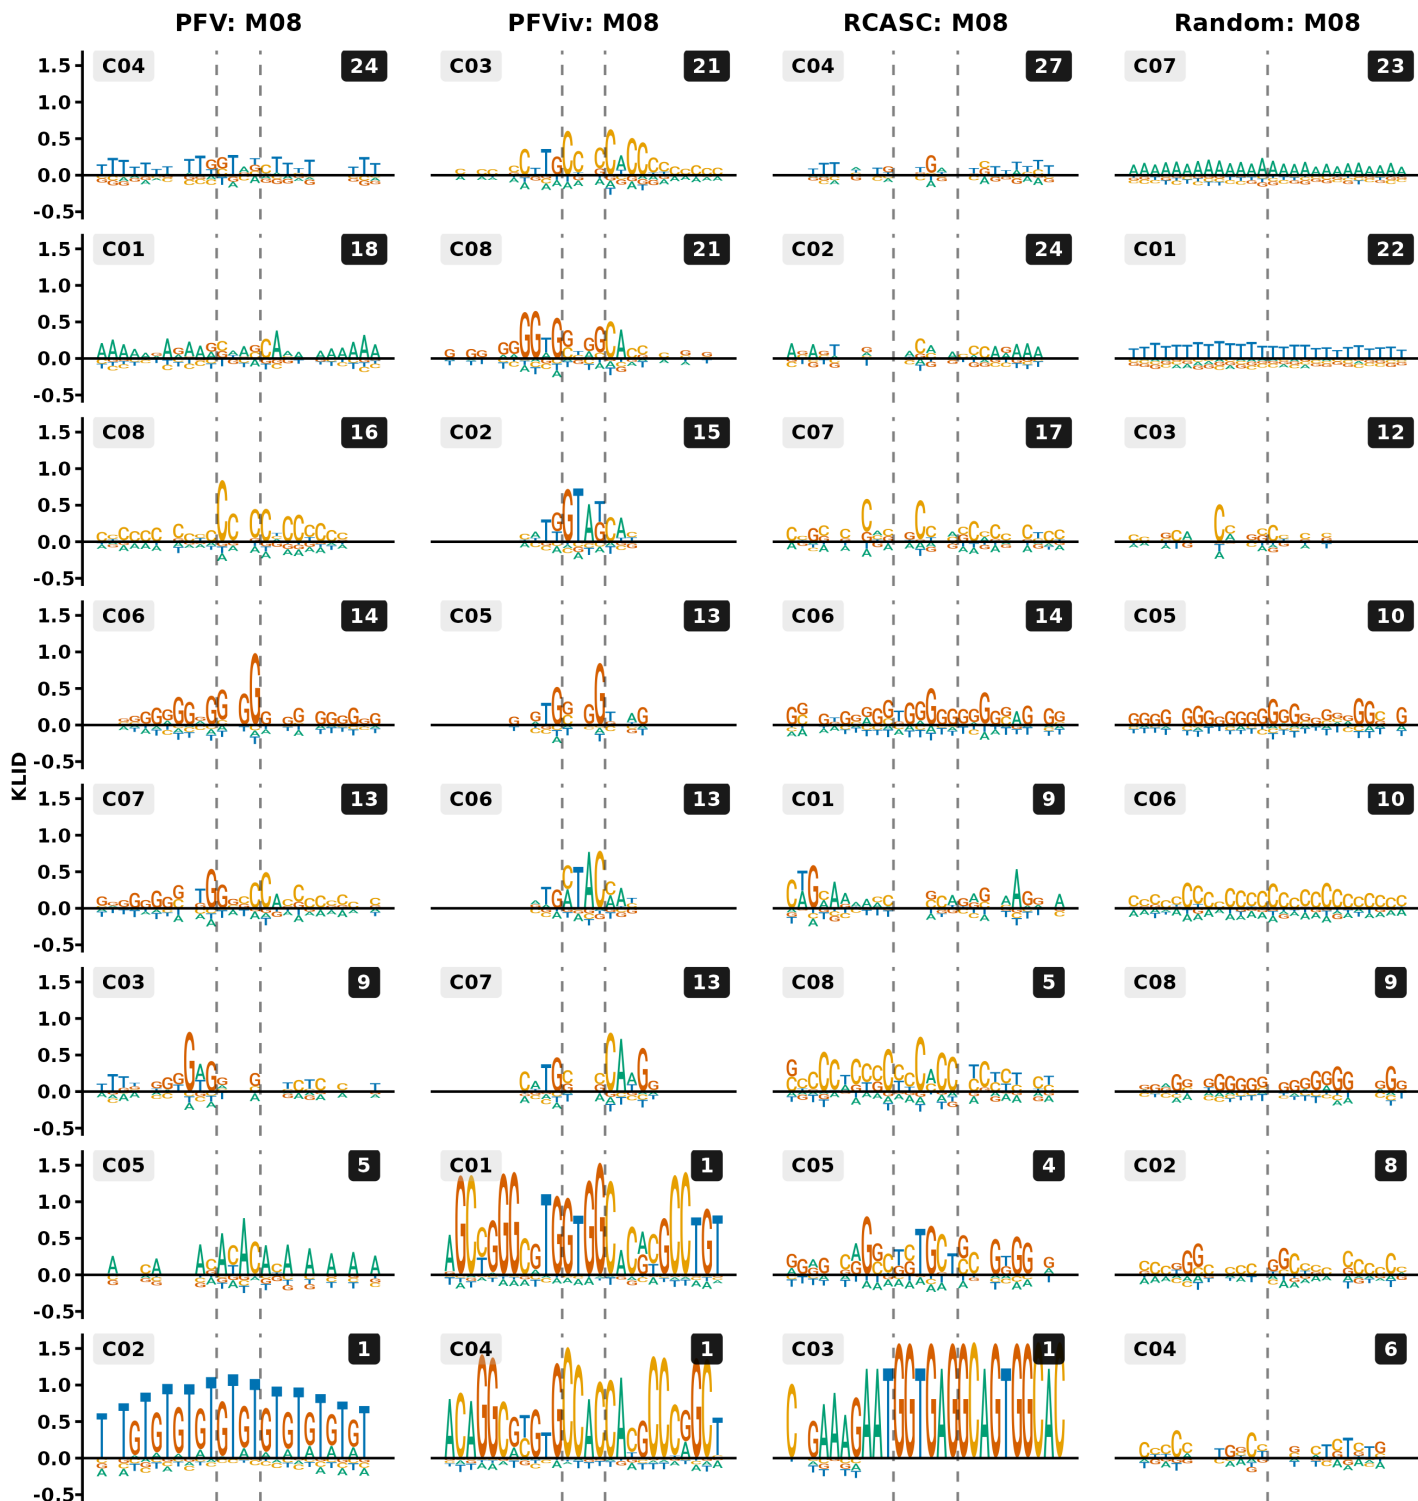

## Part 2

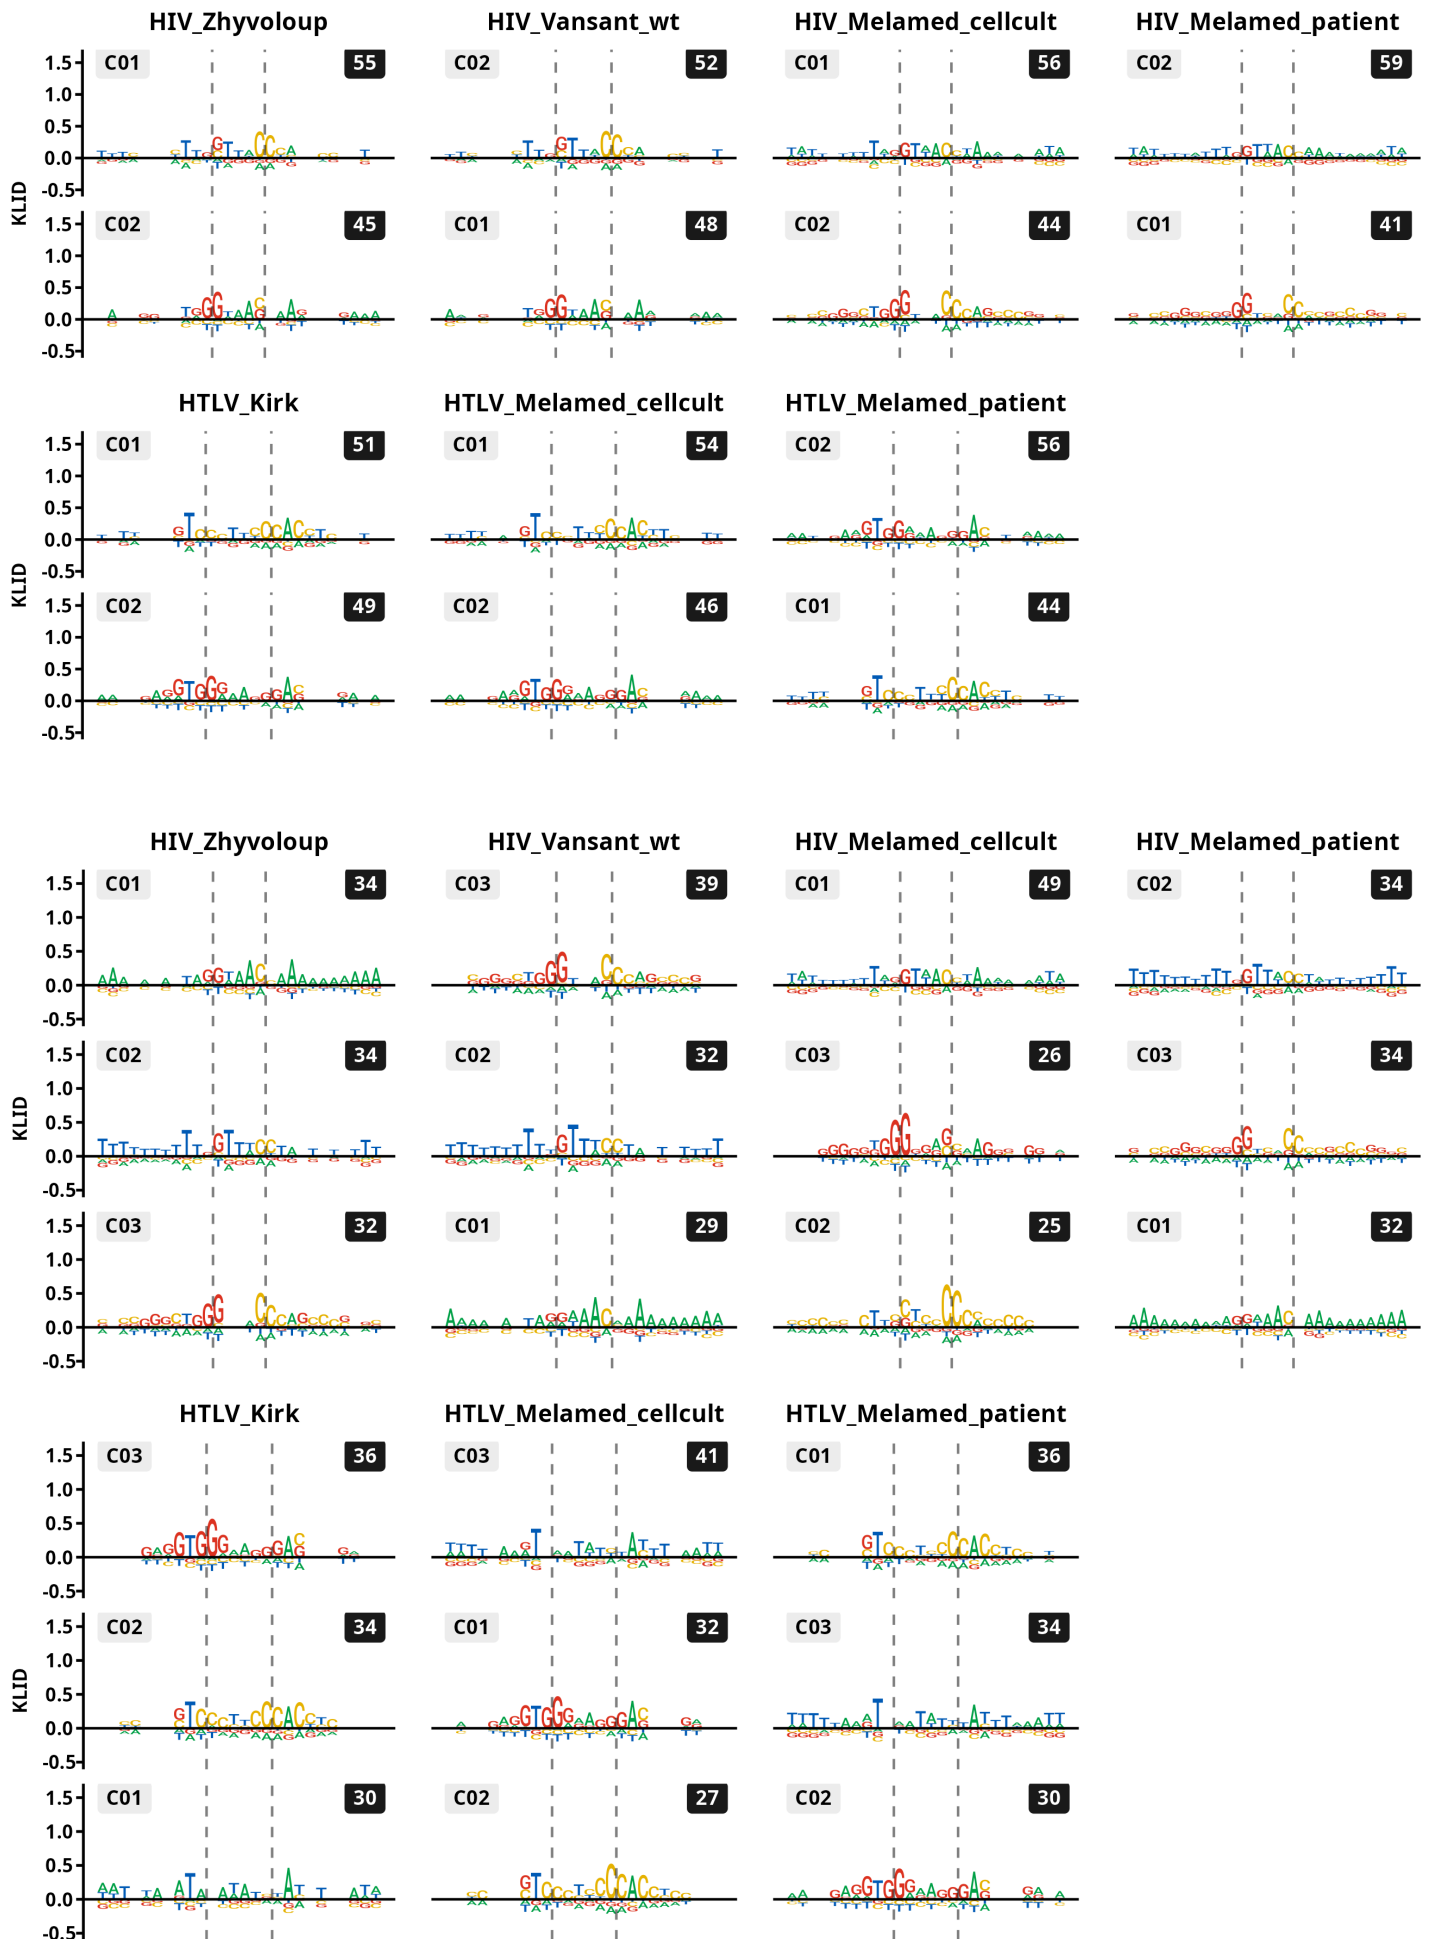



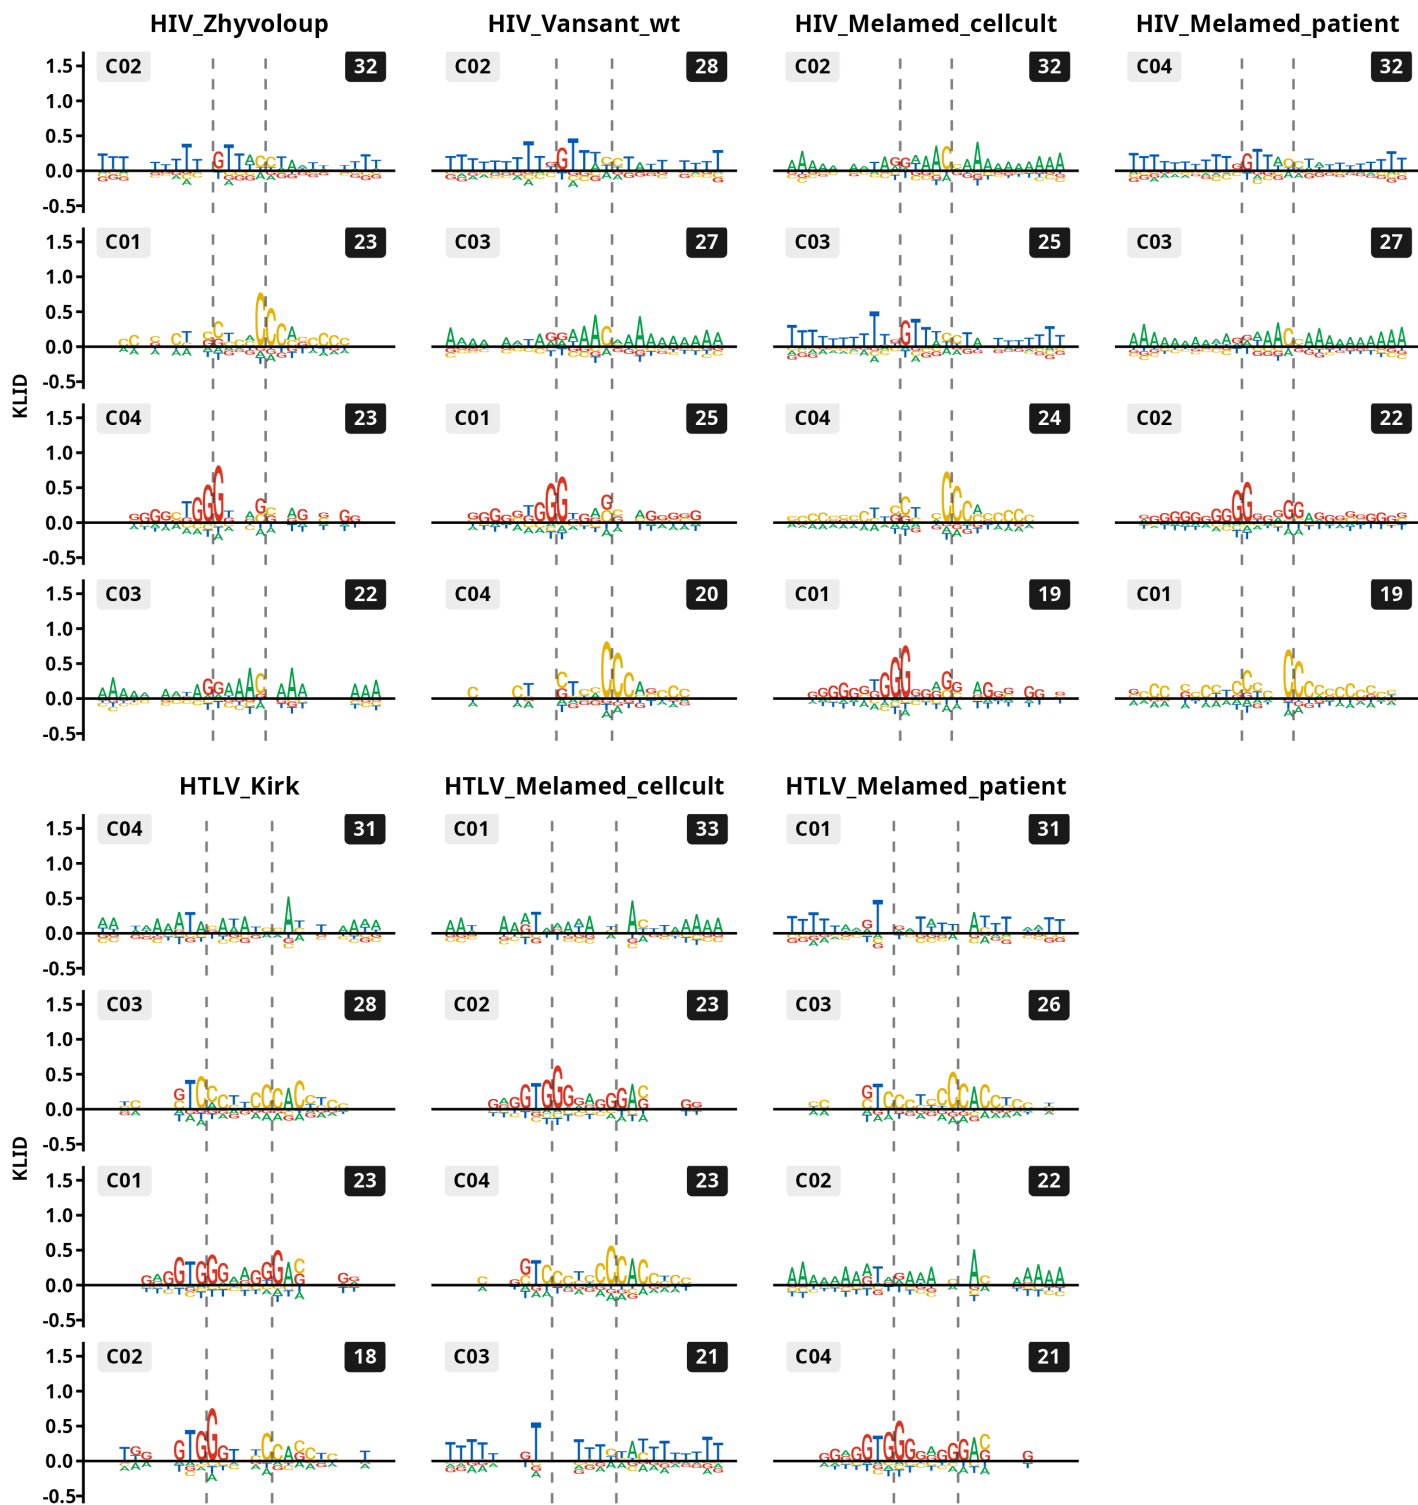



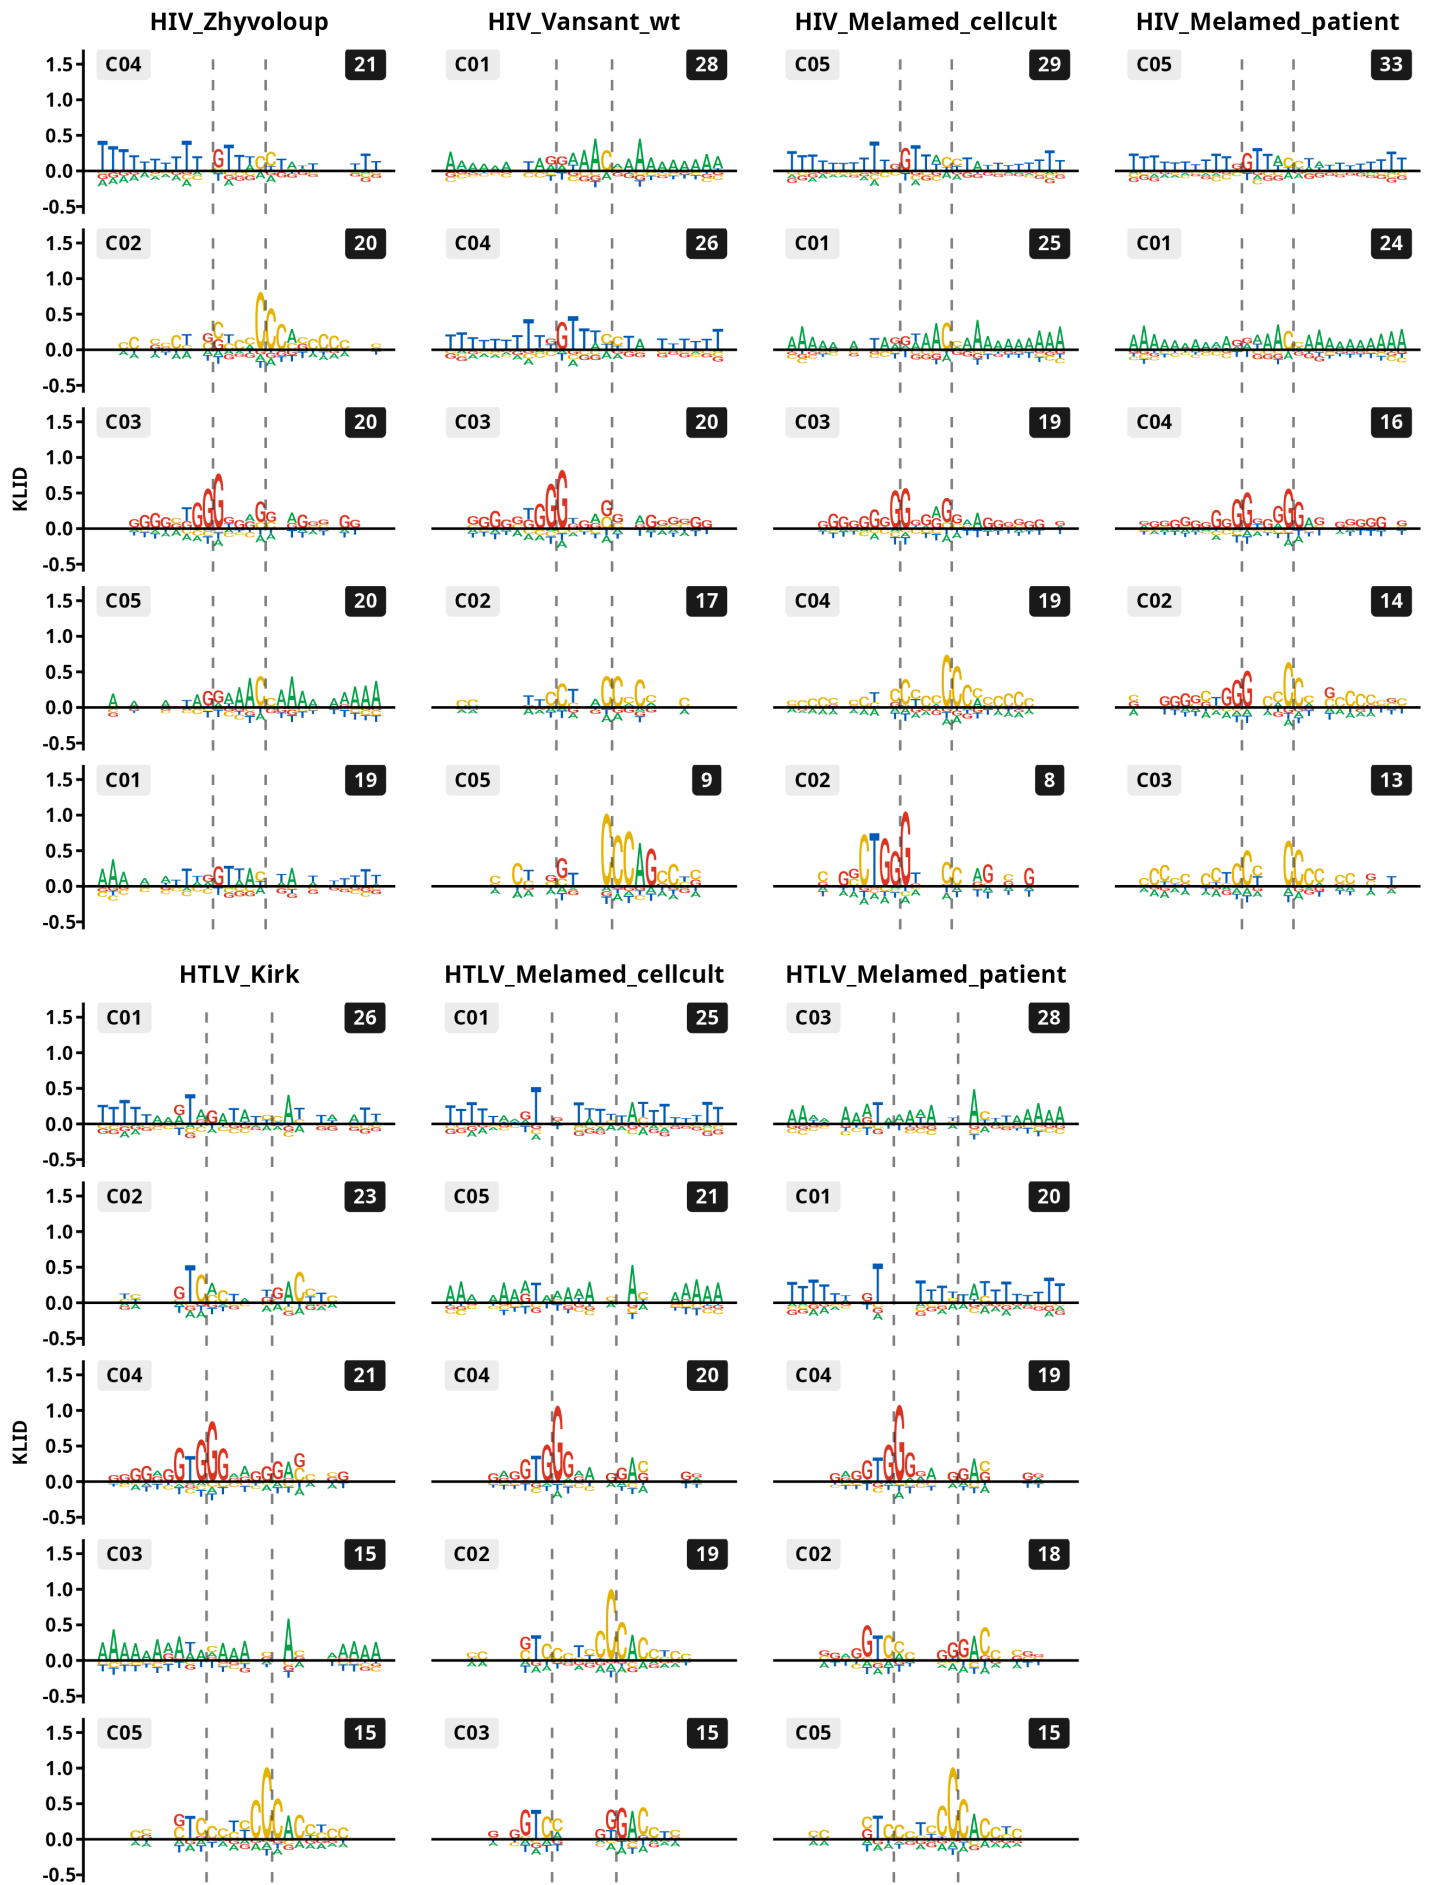

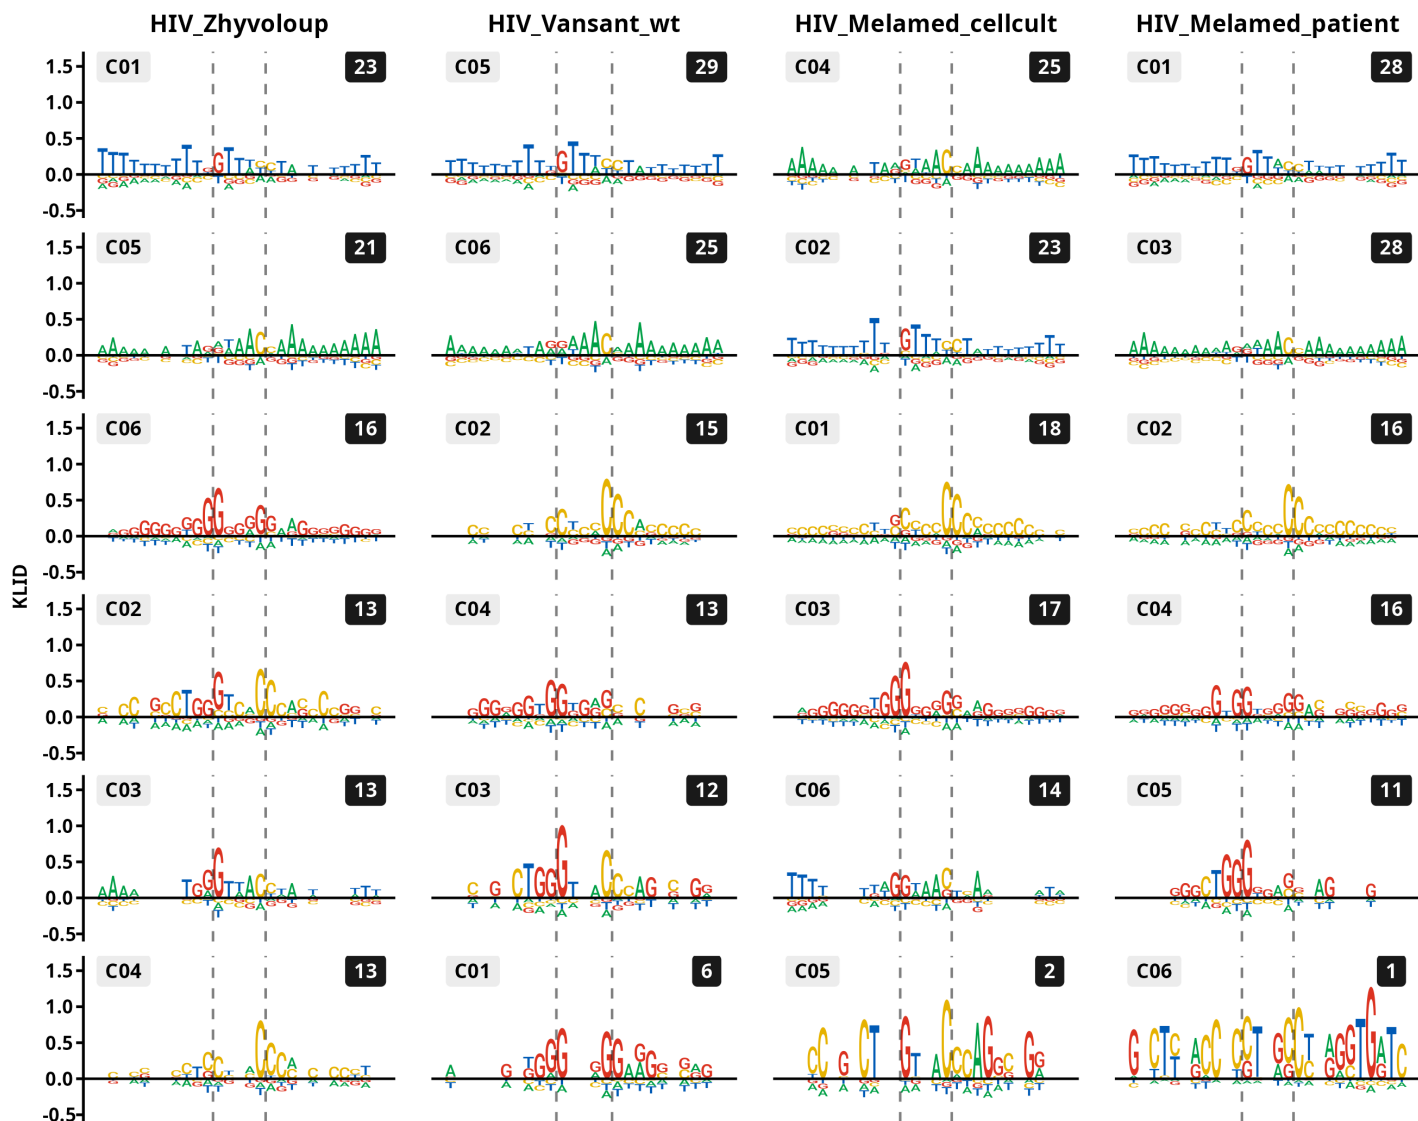

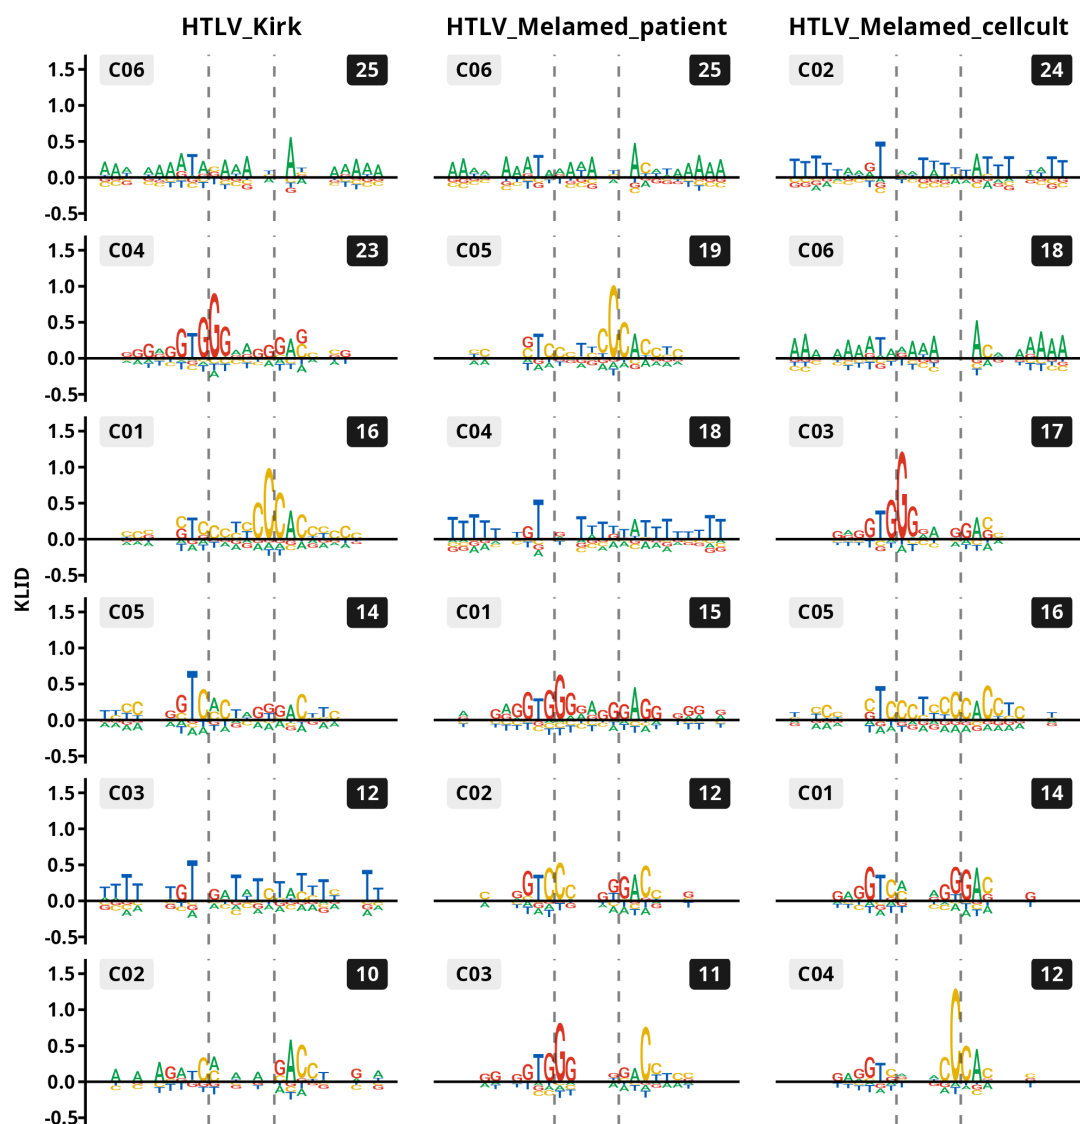

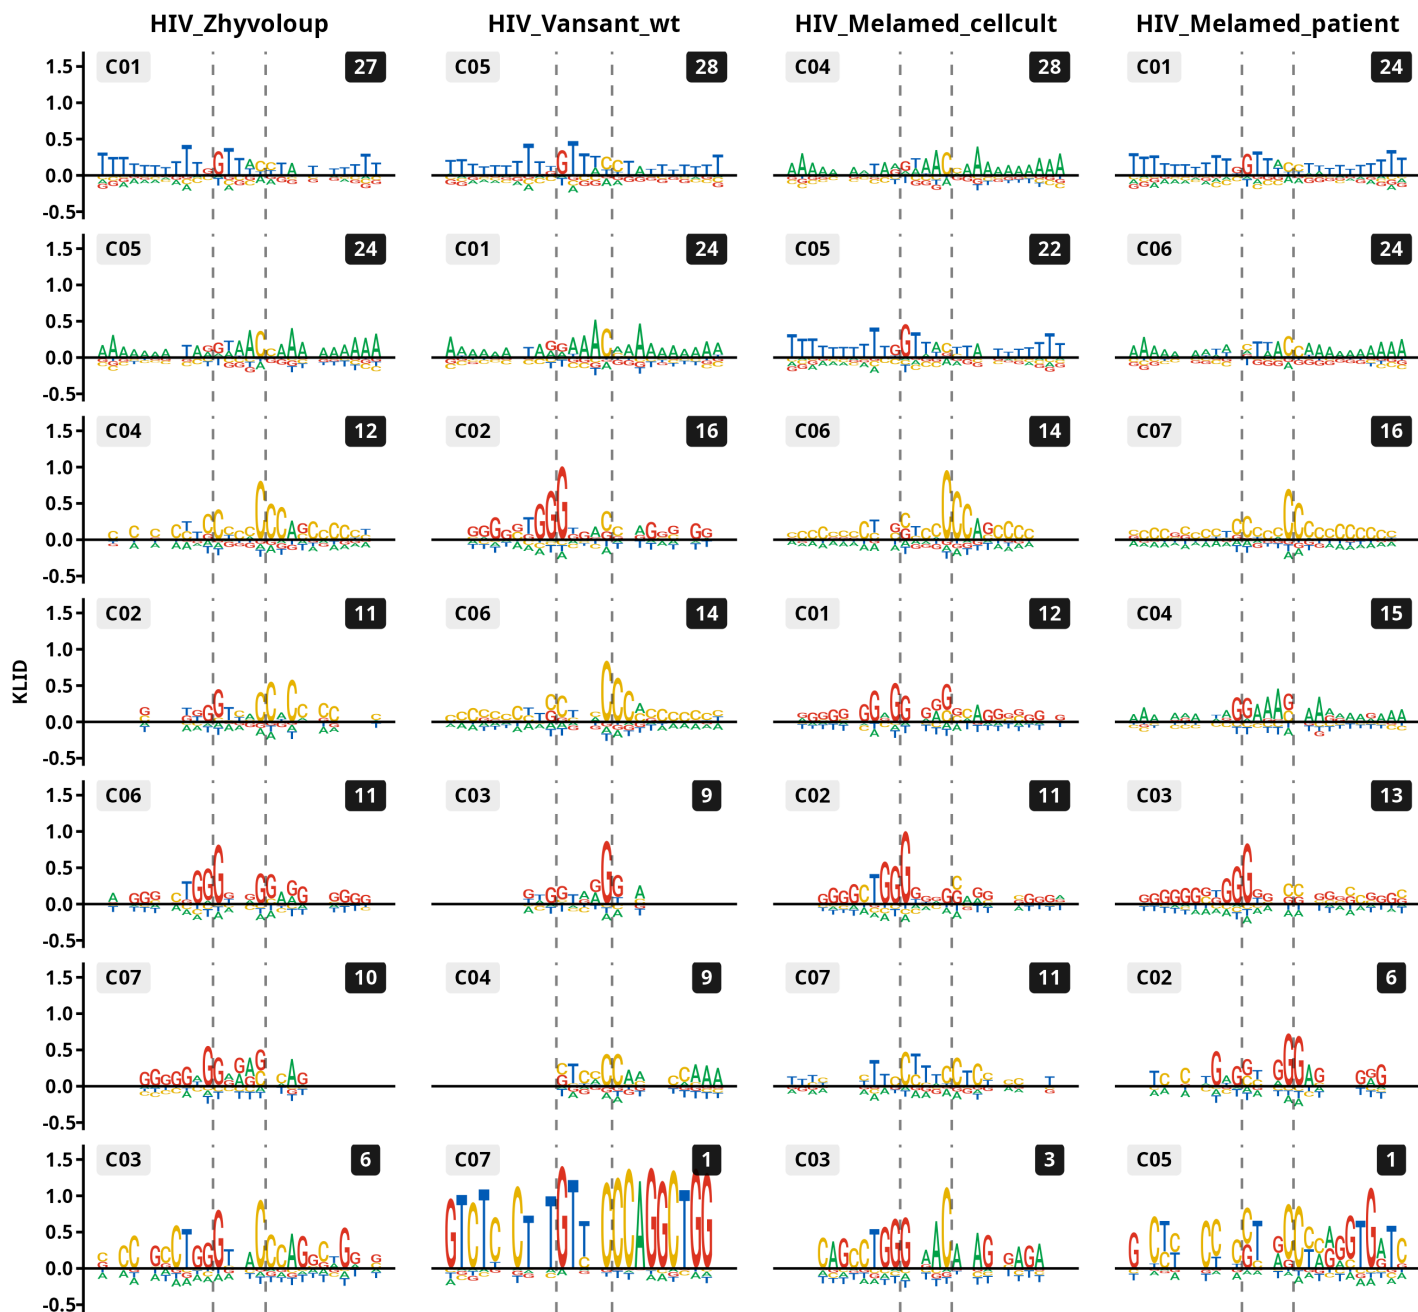

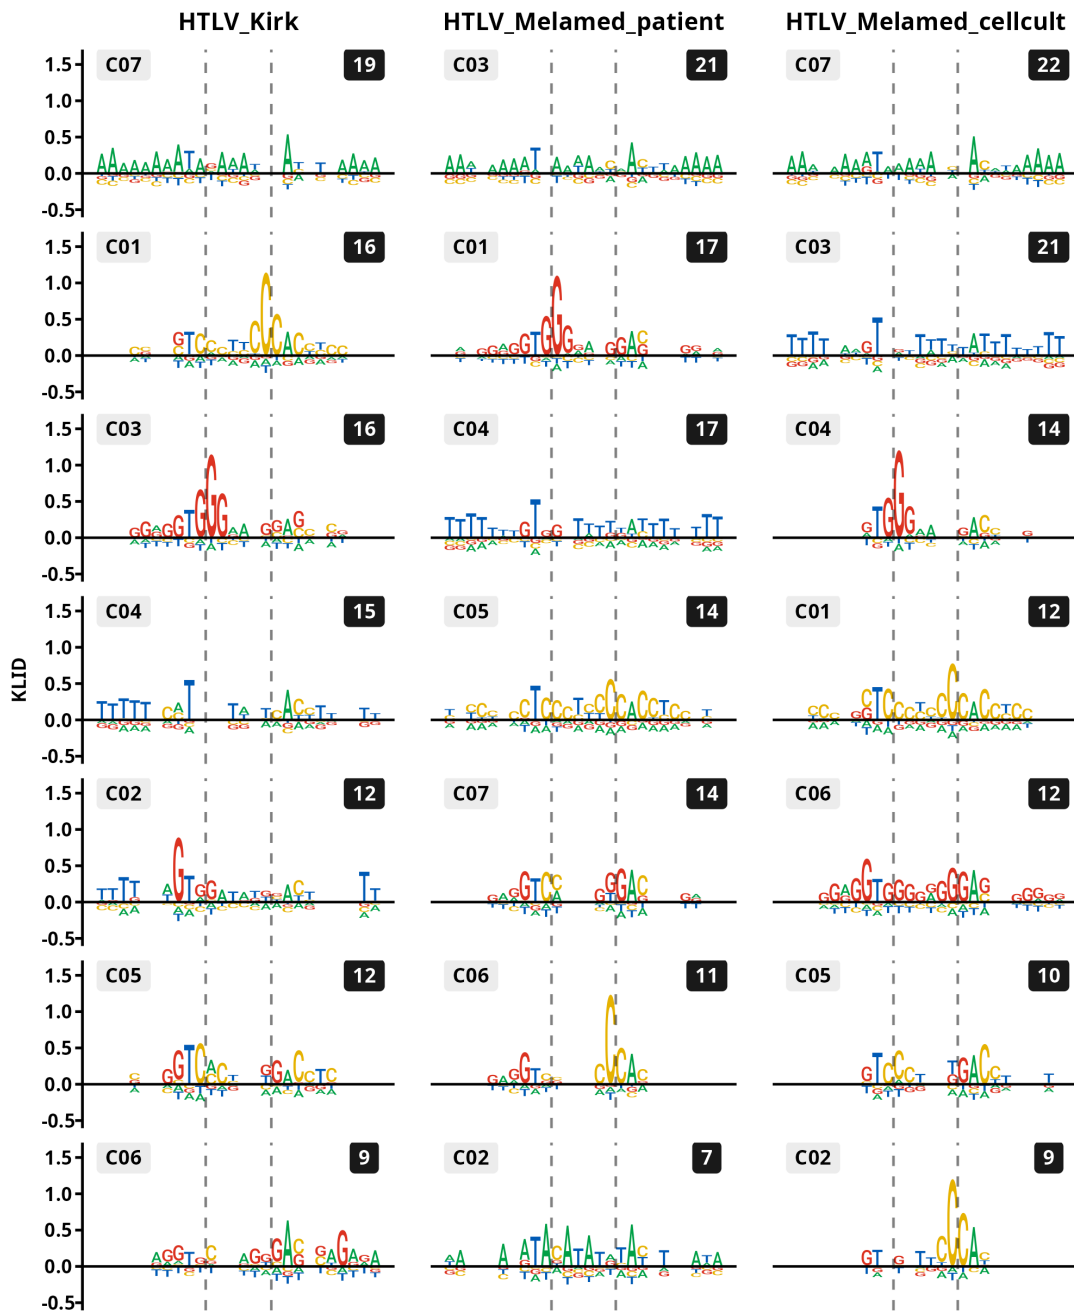

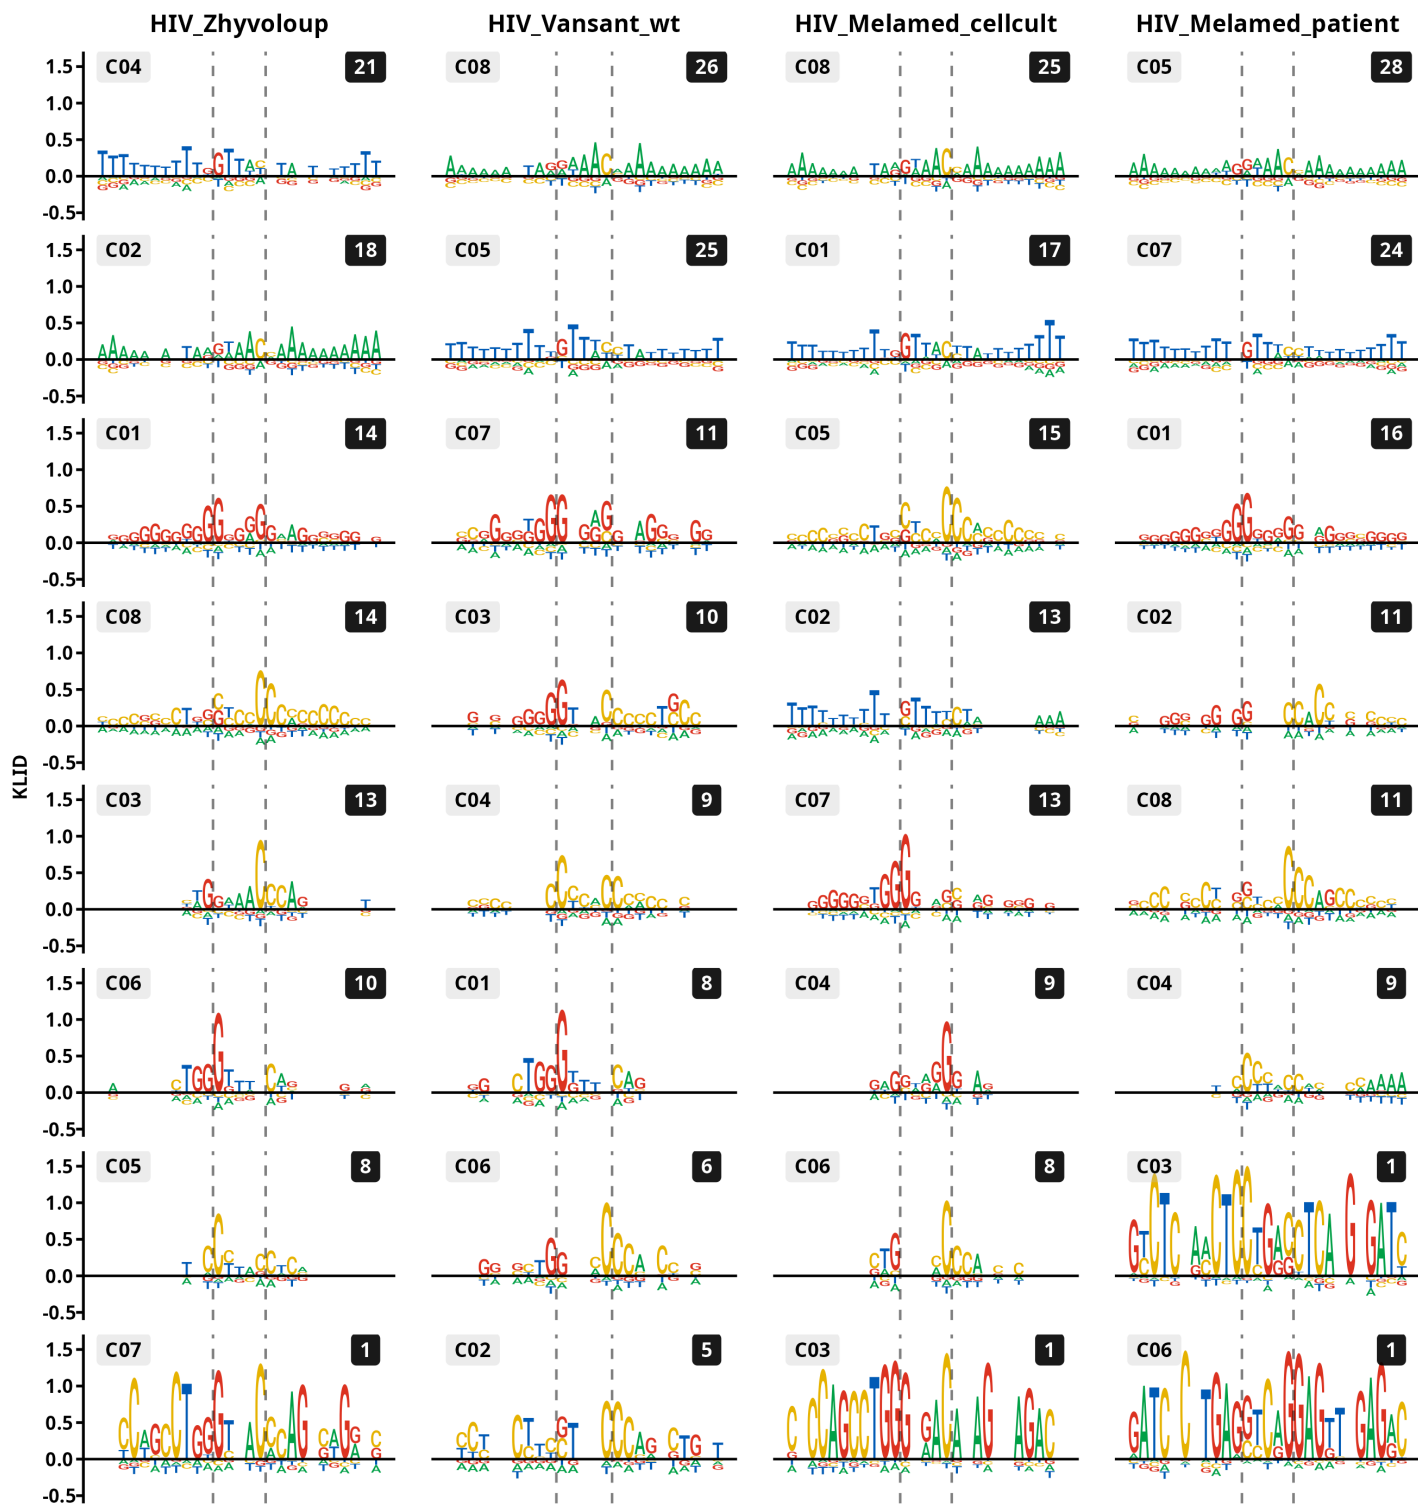

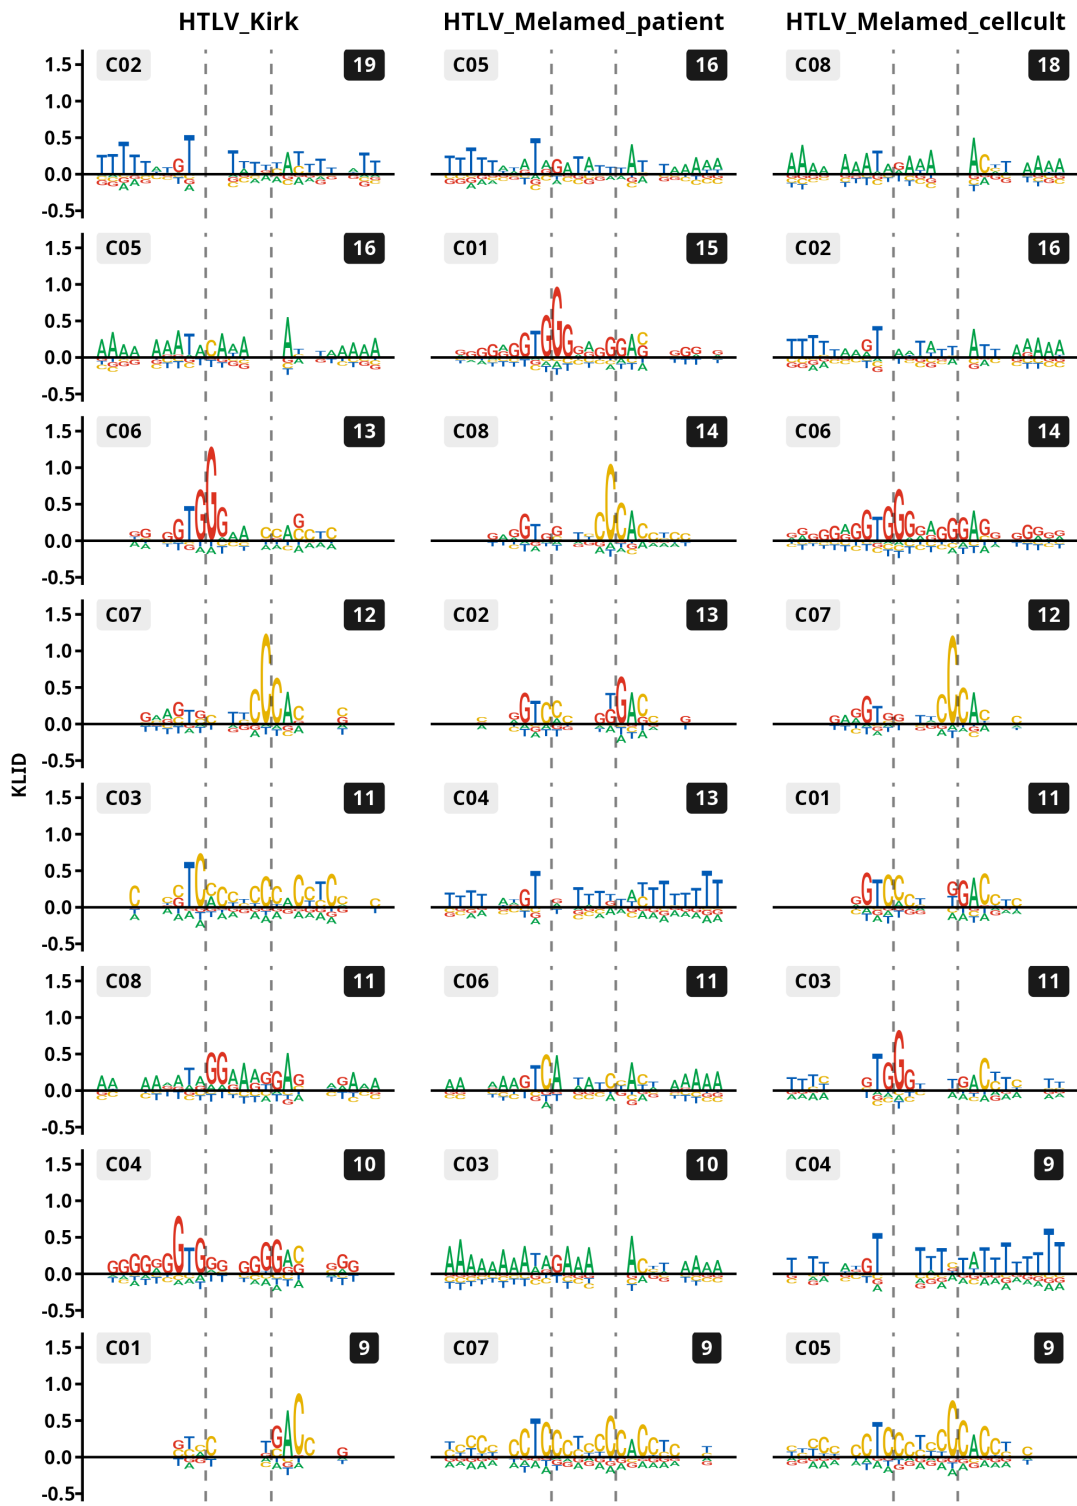

Supplement: Supplemental_Seqence_Logos.pdf [file Supplemental_Seqence_Logos.pdf]
