# Supplementary material for: Unraveling the palindromic and nonpalindromic motifs of retroviral integration site sequences by statistical mixture models
Source: HighWire-hosted journal article supplement (doi:10.1101/gr.277694.123), 2023-07-18
Supplement: Supplemental_Information_.pdf [file Supplemental_Information_.pdf]

## **Supplemental Information for**

# Unraveling the Palindromic and Non-Palindromic Motifs of Retroviral Integration Sites by Statistical Mixture Models

### **SUPPLEMENTAL TABLES**

Supplemental Tables 1 - 4

### **SUPPLEMENTAL FIGURES**

Supplemental Figures 1 - 9

### **SUPPLEMENTAL METHODS**

## SUPPLEMENTAL TABLES

| Virus  | Variant       | Cells                  | genome  | #IS     | Publication                 | Source       |
|--------|---------------|------------------------|---------|---------|-----------------------------|--------------|
| HTLV-1 | wt            | Jurkat                 | hg19    | 4521    | Kirk et al. 2016            | publication  |
| HIV-1  | wt            | Jurkat                 | hg38    | 161470  | Zhyvoloup et al. 2017       | publication  |
| MLV    | wt            | Human CD34+            | hg38    | 57991   | De Ravin et al. 2014        | SRR1145702   |
| MVV    | wt            | HEK293T                | hg38    | 411721  | Ballandras-Colas et al 2022 | GSE196040    |
| PFV    | wt            | HT1080                 | hg38    | 55384   | Lesbats et al. 2017         | GSM2584469   |
| ASLV   | RCASC         | CEF                    | galGal4 | 2096    | Malhotra et al. 2017        | upon request |
| HTLV-1 | wt            | patient PBMC           | hg38    | 162760  | Melamed et al. 2022         | publication  |
|        | wt            | cell culture (various) | hg38    | 235150  |                             | publication  |
| HIV-1  | wt            | patient PBMC           | hg38    | 44414   | Melamed et al. 2022         | publication  |
|        | wt            | cell culture (various) | hg38    | 65924   |                             | publication  |
|        | N74D          | Jurkat                 | hg38    | 63156   | Zhyvoloup et al. 2017       | publication  |
|        | wt            | SupT1                  | hg19    | 16803   | Vansant et al. 2020         | GSE135295    |
|        | wt (LEDGIN+)  |                        |         | 15683   |                             |              |
|        | wt (LEDGF-KD) |                        |         | 9069    |                             |              |
|        | wt            | SupT1                  | hg18    | 6530    | Demeulemeester et al. 2014  | upon request |
|        | IN variants   | SupT1/HelaP4           | hg18    | 27502 * |                             |              |
| PFV    | wt            | in vitro               | hg38    | 4226638 | Lesbats et al. 2017         | GSM2584468   |
| ASLV   | ALVJ          | CEF                    | galGal4 | 1956    | Malhotra et al. 2017        | upon request |
| ASLV   | LR9           |                        |         | 1210    |                             |              |
| ASLV   | RCASC         | HeLa                   | hg19    | 837     |                             |              |
| ASLV   | RSV           | Human CD34+            | galGal4 | 1239    | Moiani et al. 2014          | SRR1282019   |

Supplemental Table 1. List of the data sets used in the study and sources of the data. The bold text marks the data used for the presentation of mixture model components in the main text. Data where the source is stated as “upon request” were requested and gained directly from the authors of the study.

\* number represents the sum of all IS of all variants analyzed in the present study. Numbers for individual variants can be found in Supplemental Table 2.

| start | end | Mapped sequences |
|-------|-----|------------------|
| 248   | 275 | 585              |
| 82    | 109 | 235              |
| 31    | 58  | 39               |
| 166   | 193 | 27               |
| 248   | 274 | 13               |
| 248   | 276 | 9                |
| 248   | 273 | 8                |
| 61    | 77  | 5                |
| 178   | 193 | 4                |
| 248   | 269 | 4                |
| 82    | 107 | 4                |
| 166   | 189 | 3                |
| 248   | 272 | 3                |
| 82    | 101 | 3                |
| 82    | 110 | 3                |
| 247   | 275 | 2                |
| 248   | 280 | 2                |
| 251   | 272 | 2                |
| 251   | 275 | 2                |
| 74    | 95  | 2                |

Supplemental Table 2. Twenty ranges in the *Alu* consensus sequence with the most HIV IS sequences mapped. In total, 1,587 27 bp long sequences associated with component C07 of the M08 HIV mixture were mapped to *Alu* consensus of which 971 sequences were identified as mapping. A full table of targeted ranges can be found in supplemental files as:

*HIV\_Zhyvoloup\_M08\_PPM07\_in\_hg38\_rmsk\_Alu\_to\_consensus\_PosFreq.txt*

| Study                 | Variant     | IS count      | intra <i>Alu</i><br>IS;Shuffle | CT..G...C..AG<br>IS;Shuffle |
|-----------------------|-------------|---------------|--------------------------------|-----------------------------|
| <b>Zhyvoloup</b>      | <b>WT</b>   | <b>161533</b> | <b>20690;16927</b>             | <b>930;26.5</b>             |
| Zhyvoloup             | N74D        | 63156         | 3108;6568                      | 153;5                       |
| <b>Vansant</b>        | <b>WT</b>   | <b>16803</b>  | <b>2262;1855</b>               | <b>109;1</b>                |
| Vansant               | LEDGIN      | 15683         | 1652;1664                      | 87;3                        |
| Vansant               | LEDGF-KD    | 9069          | 952;897                        | 44;1                        |
| <b>Demeulemeester</b> | <b>WT</b>   | <b>6530</b>   | <b>697;652</b>                 | <b>33;0.5</b>               |
| Demeulemeester        | S119A       | 1549          | 144;156                        | 1;0.5                       |
| Demeulemeester        | S119T       | 2066          | 194;208                        | 2;0                         |
| Demeulemeester        | S119T_R231G | 2467          | 140;249                        | 7;0                         |
| Demeulemeester        | R231G       | 4897          | 357;531                        | 14;1                        |
| Demeulemeester        | R231K       | 1098          | 110;125                        | 10;0                        |
| Demeulemeester        | R231L       | 2314          | 184;239                        | 3;0                         |
| Demeulemeester        | R231Q       | 2438          | 216;273                        | 6;0.5                       |
| Demeulemeester        | S119P       | 1369          | 143;144                        | 0;NA                        |
| Demeulemeester        | S119G       | 1225          | 172;117                        | 0;NA                        |
| Demeulemeester        | S119I       | 1092          | 132;100                        | 1;0                         |
| Demeulemeester        | S119K       | 4682          | 436;469                        | 9;1                         |
| Demeulemeester        | S119R       | 1132          | 119;116                        | 0;NA                        |
| Demeulemeester        | S119V       | 1173          | 107;112                        | 0;NA                        |

Supplemental Table 3. Numbers of HIV-1 total IS and IS overlapping with *Alu* elements. The last column displays the number of IS found inside *Alu* and inside the palindromic motif. Intra *Alu* and CT..G...C..AG columns contain two values; the first shows the IS count, while the second shows the number of shuffled control IS. NA - frequencies were not calculated if the sample count was zero.

| Random set          | A                 | C                 | G                 | T                 |
|---------------------|-------------------|-------------------|-------------------|-------------------|
| Ran9k_hg19_is26     | 0.296790192775594 | 0.204915522433771 | 0.202801456451091 | 0.295492828339544 |
| Ran9k_hg19_is27     | 0.294440458157272 | 0.204239637867956 | 0.205076758174103 | 0.296243145800668 |
| Ran10k_galGal4_is26 | 0.294465384615385 | 0.204642307692308 | 0.207746153846154 | 0.293146153846154 |

Supplemental Table 4. Expected nucleotide probabilities. Nucleotide frequencies were derived from  $9 \times 10^6$  (Ran9k) or  $10^7$  (Ran10k) sequences of randomly selected 26 or 27 bp long ranges from human (hg19) and chicken (galGal4) reference genomes.

## SUPPLEMENTAL FIGURES

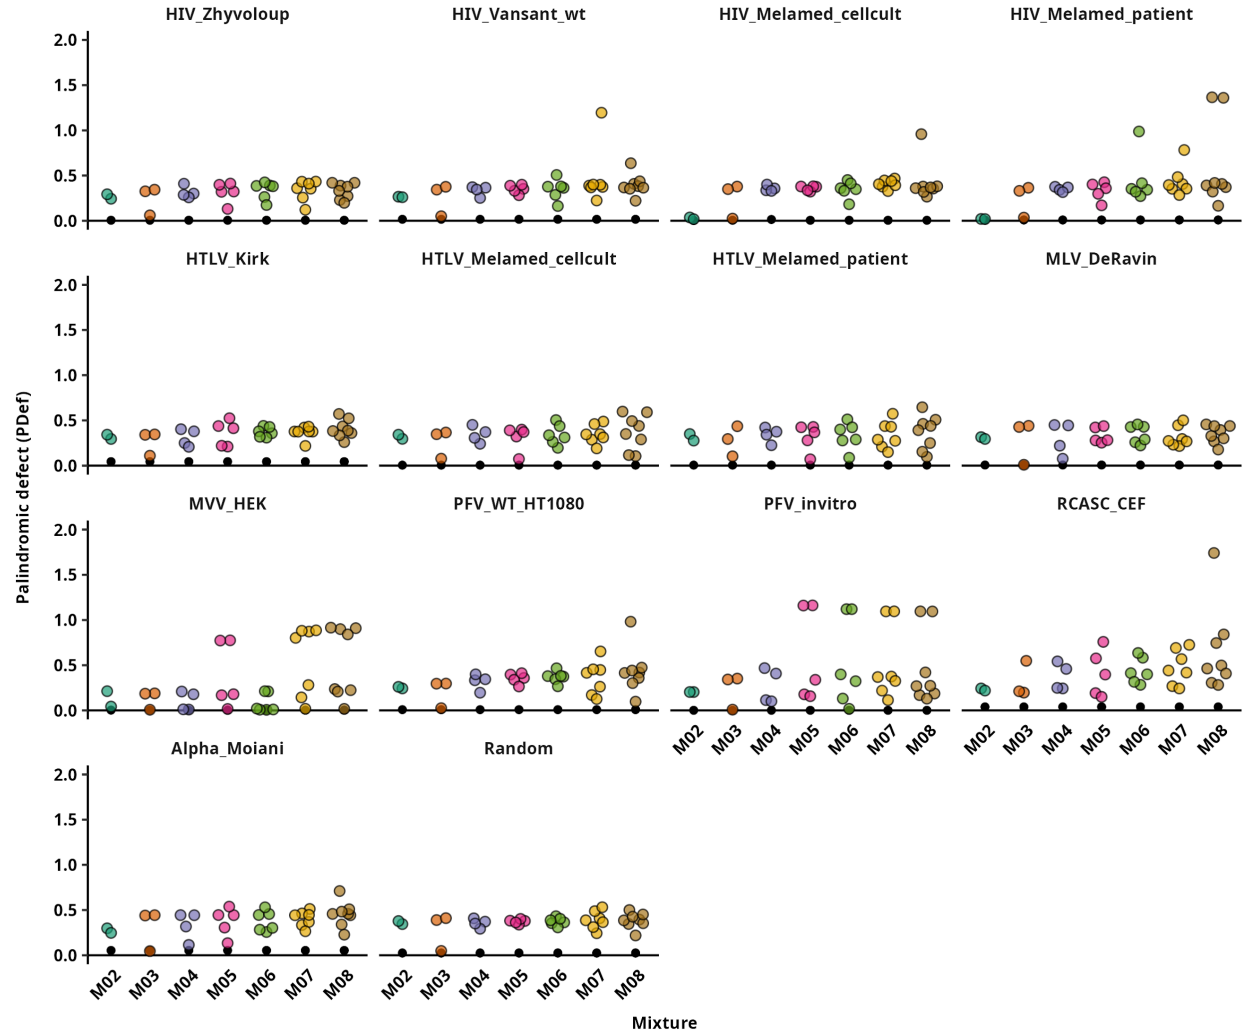

Supplemental Figure 1. Representation of palindromic defect (PDef) of component PPMs. The PDef corresponds to the distance from self-reverse-complementarity and is equal to zero for palindromic PPMs. All PPMs for each retroviral IS component mixture are represented. On the x-axis, mixtures are ordered by the number of components from two-component (M02) to eight-component (M08) mixture. The PDef of the complete IS set (PPM0, logos in Fig. 1A) is included as a dark circle in each column.

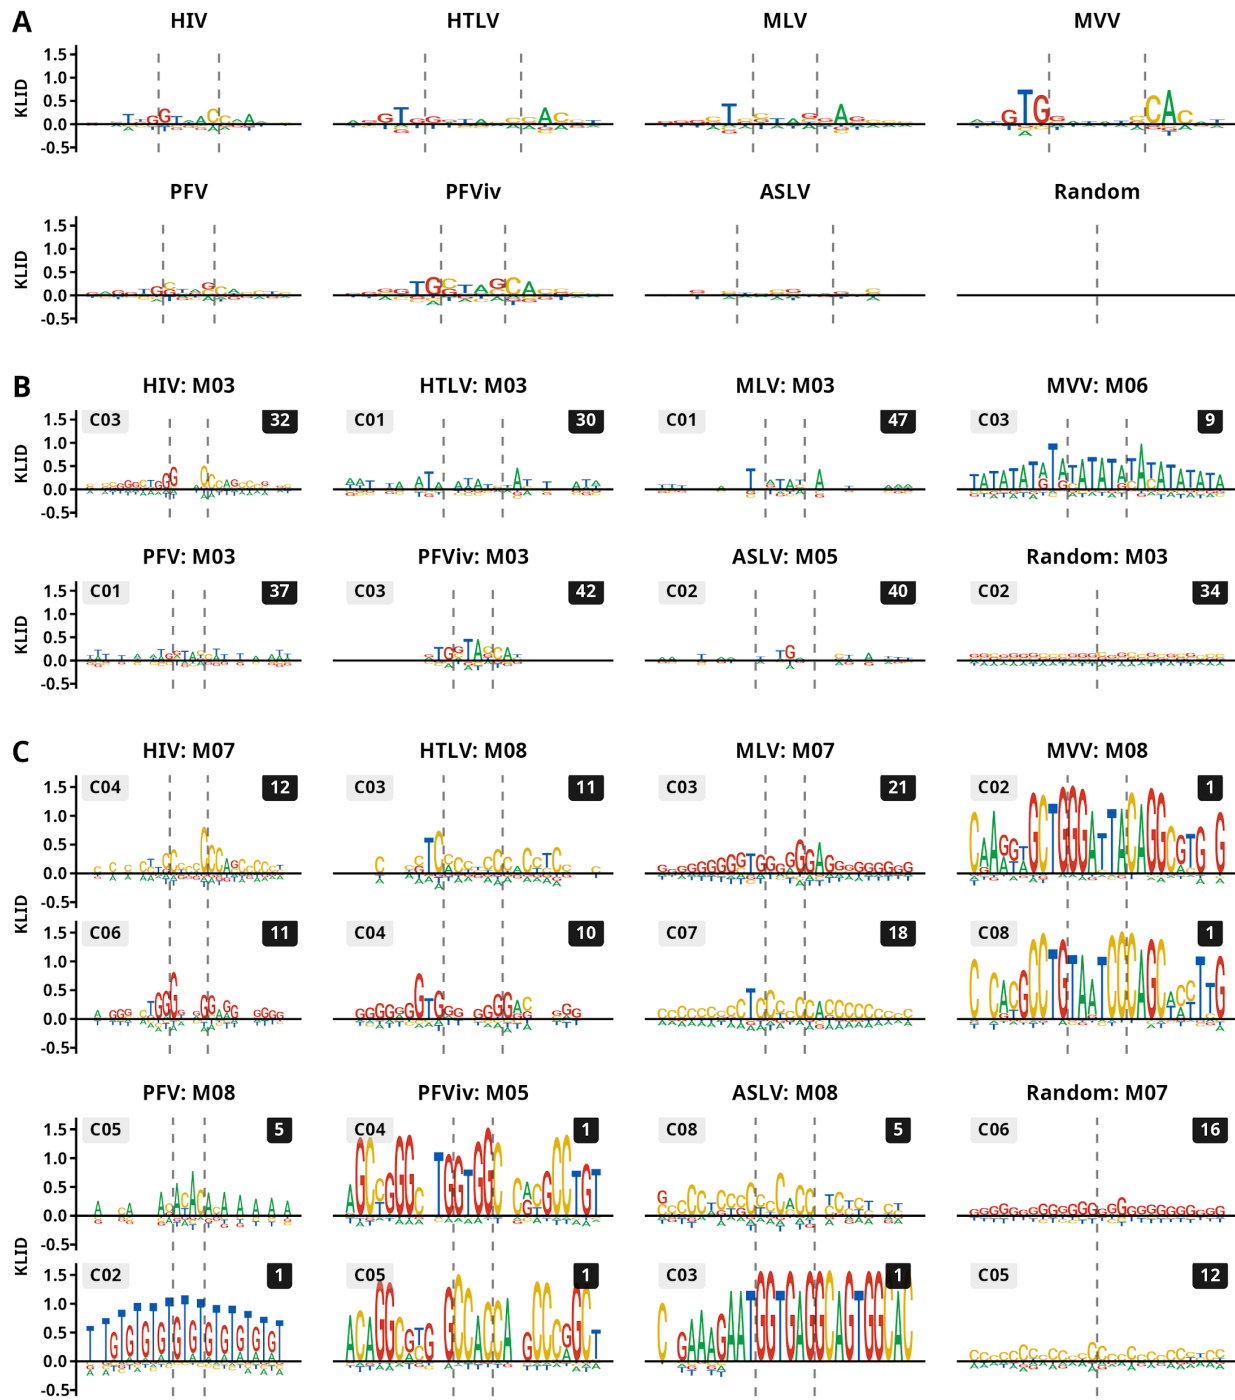

Supplemental Figure 2. Sequence logos of selected mixture components. A) Sequence logos derived from PPMs representing complete sets of retroviral IS and set of random genomic sequences. Panels B) and C) show sequence logos representing B) component PPMs with the lowest observed PDef across all retroviral IS mixtures (i.e. the most palindromic components) and C) component PPMs with the highest observed PDef across all retroviral IS mixtures (i.e. the most reverse-complement asymmetric components; on top) together with the PPMs displaying the lowest reverse-complementary distance to the asymmetric PPMs. Each sequence logo contains the name of the mixture on the top, the component

name in the top left corner, and the component weight multiplied by 100 in the top right corner. Logos represent IS sequences spanning 13 nucleotides to each side from the center of the sequences. Vertical dashed lines mark sites where strand transfer reaction takes place.



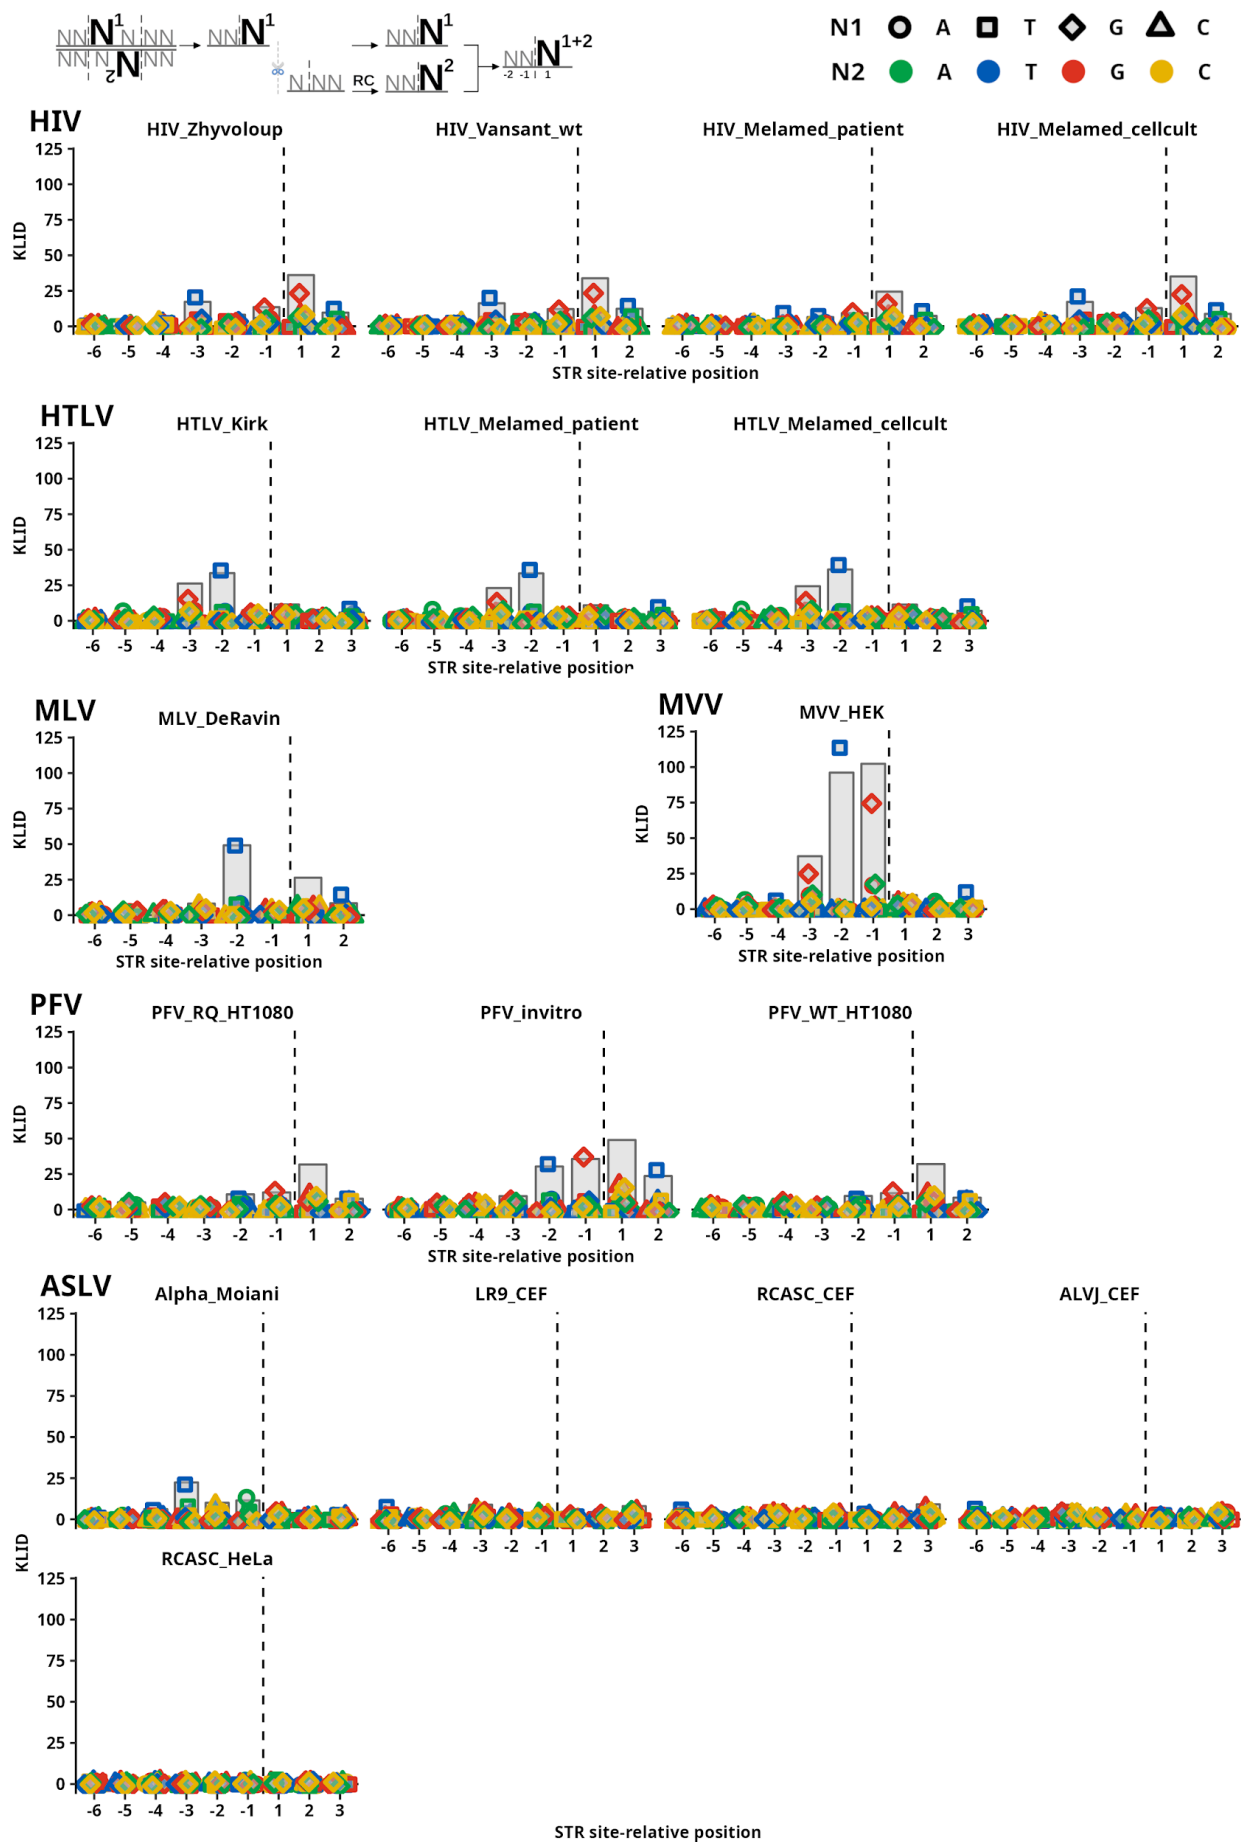

Supplemental Figure 3. KLID representation of enrichment for positional nucleotide combinations. KLID score of dinucleotide combinations at complementary sites marked by position related to the STR site. The position of the STR site is marked by the vertical dashed line. Positions upstream to the STR site are marked with negative values. Gray bars represent the total KLID value at the position. Colored points represent individual contributions of each of the nucleotide combinations.

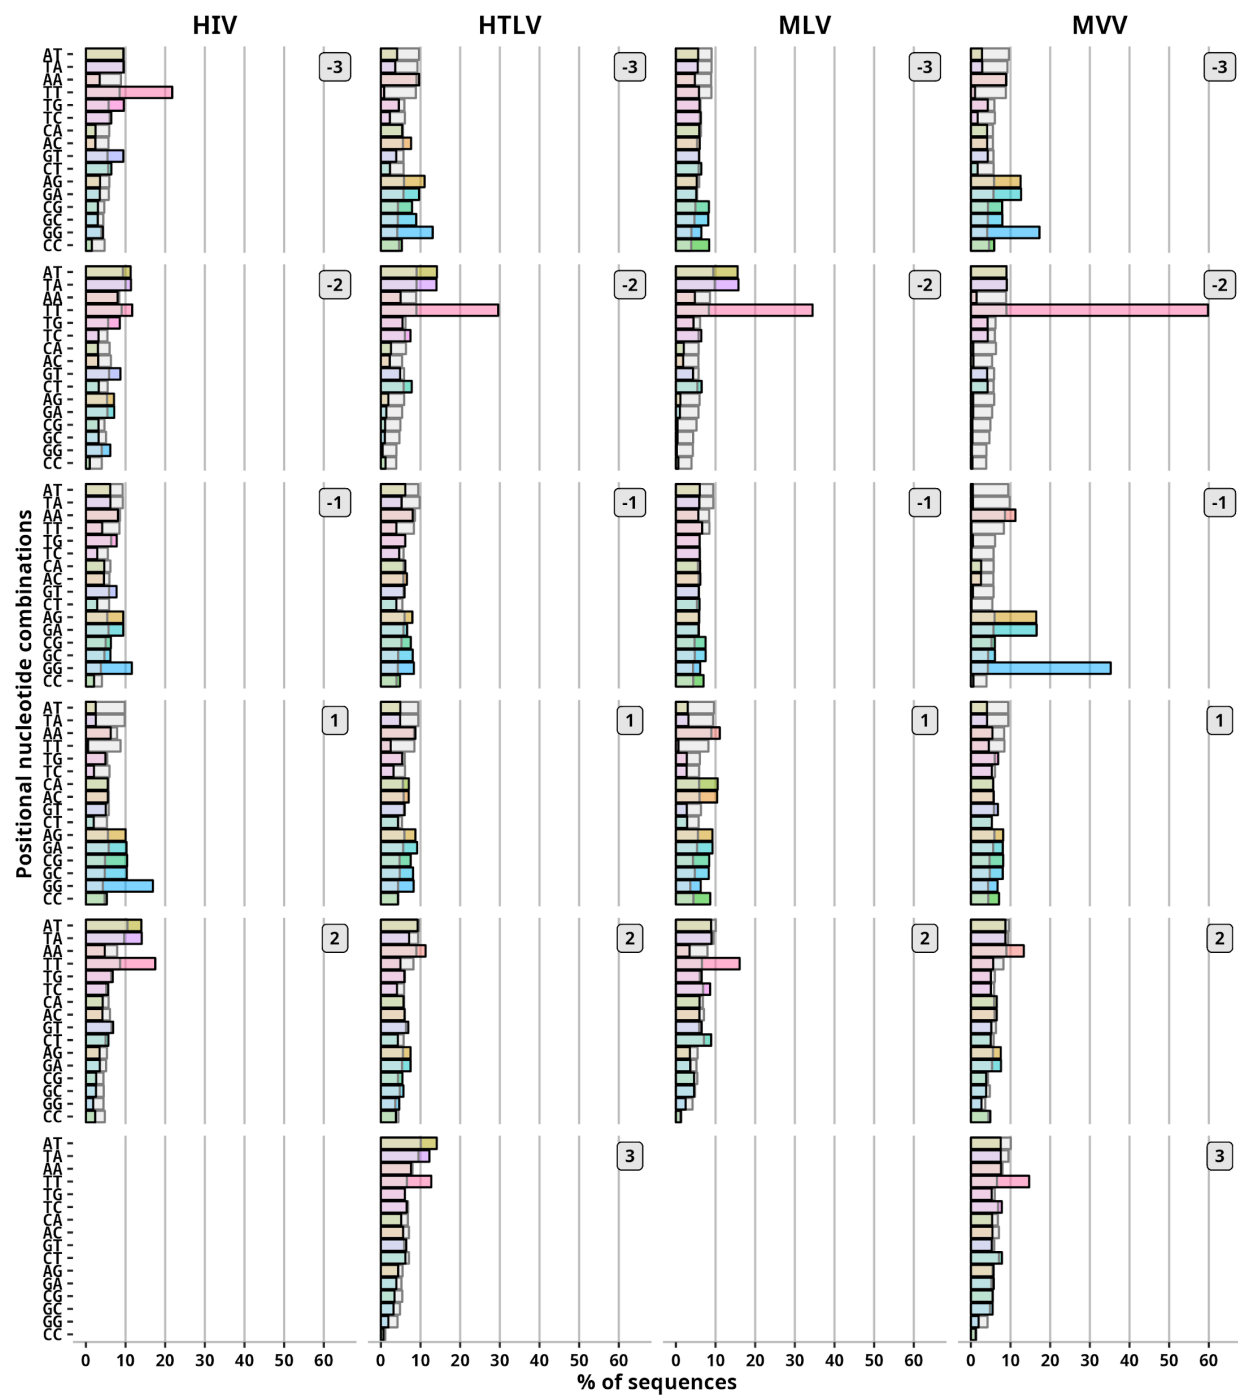

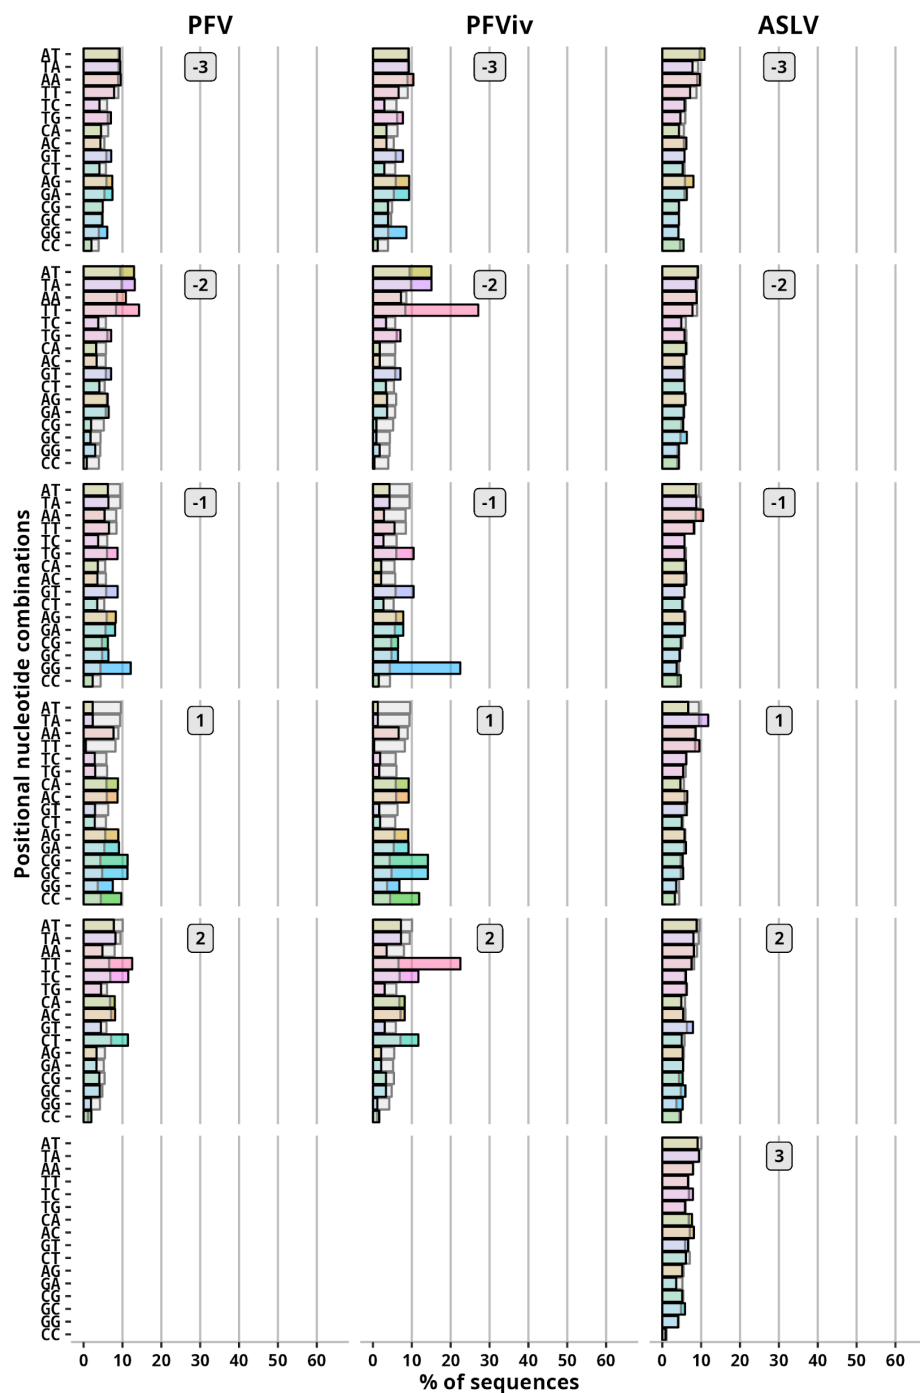

Supplemental Figure 4. Frequency of positional combinations. Frequency of sequences with marked positional nucleotide combination. Gray bars represent the frequency observed in a control (random) set of sequences. The numbers right of the bars show the position relative to the cleavage site. Positions upstream to the STR site are marked with negative values.

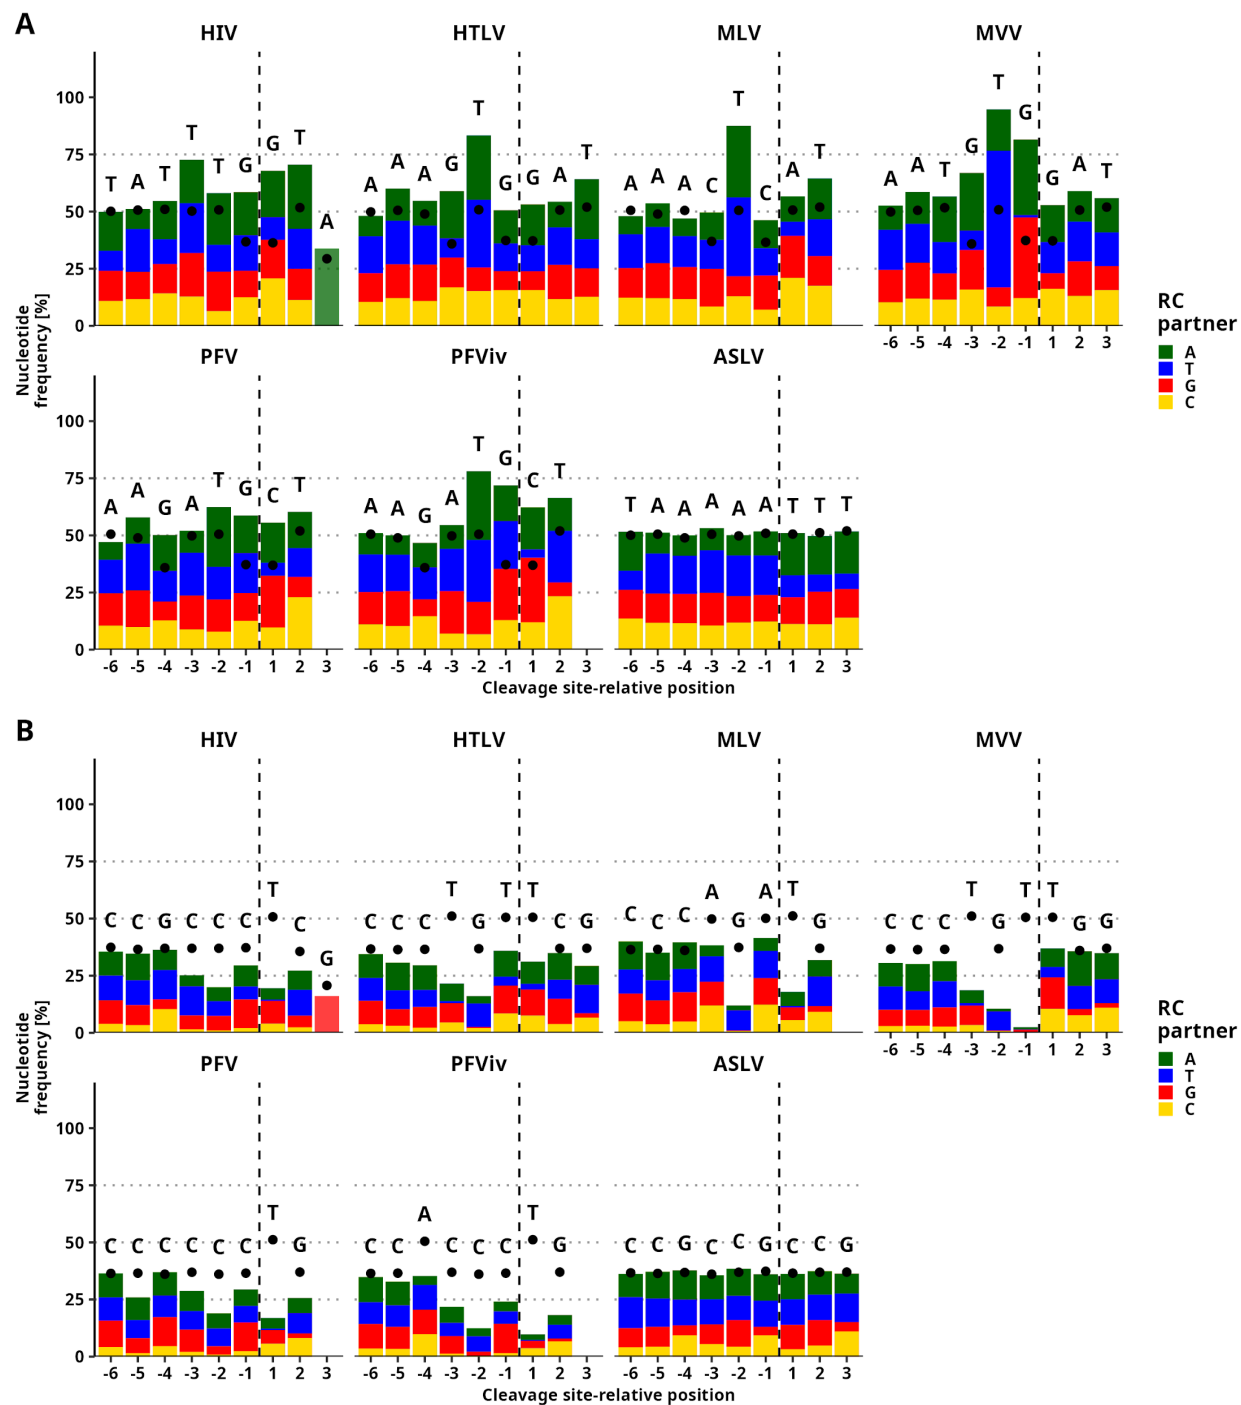

Supplemental Figure 5. The most and least frequent nucleotides at STR site-relative positions. A) The most frequent nucleotide. B) Least frequent nucleotides. Dots represent expected frequencies at the position. The height of colored bars represents the frequency of nucleotide present at the complementary site.

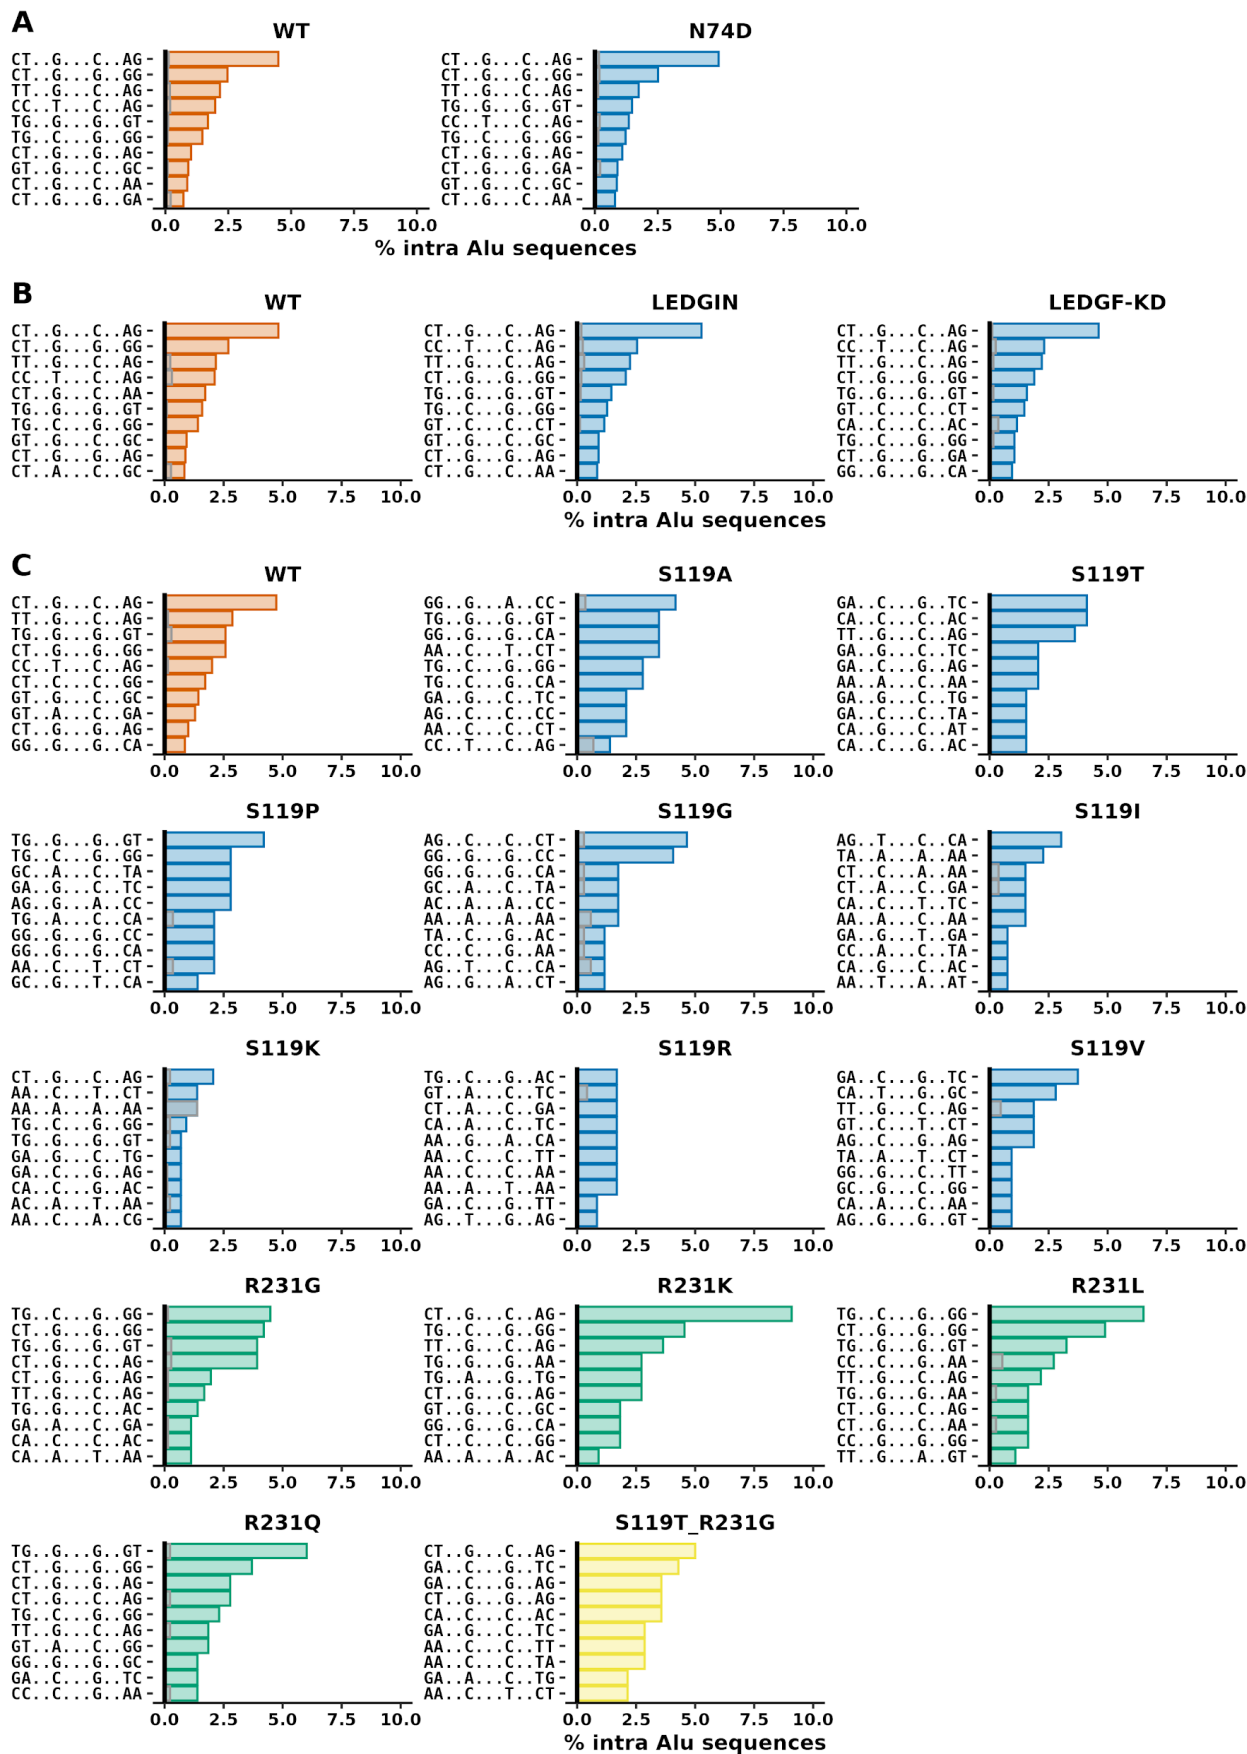

Supplemental Figure 6. Frequency of motifs at intra-Alu IS of HIV integrations sites. Frequency of the sequence motifs among intra-Alu IS. Gray bars represent the mean frequency of 100 iterations of shuffled controls created for each IS set. The ten most frequent sequence motifs are shown. Panels A) and B) show data from IS sets where integration retargeting was achieved by interruption of capsid-CPSF6 A) or IN-LEDGEF/p75 B) interactions. Panel C) shows data from IS sets where mutations of S119 of R231 were introduced to HIV-1 IN. Each set contains its own set of control (wt) with unaffected integration.

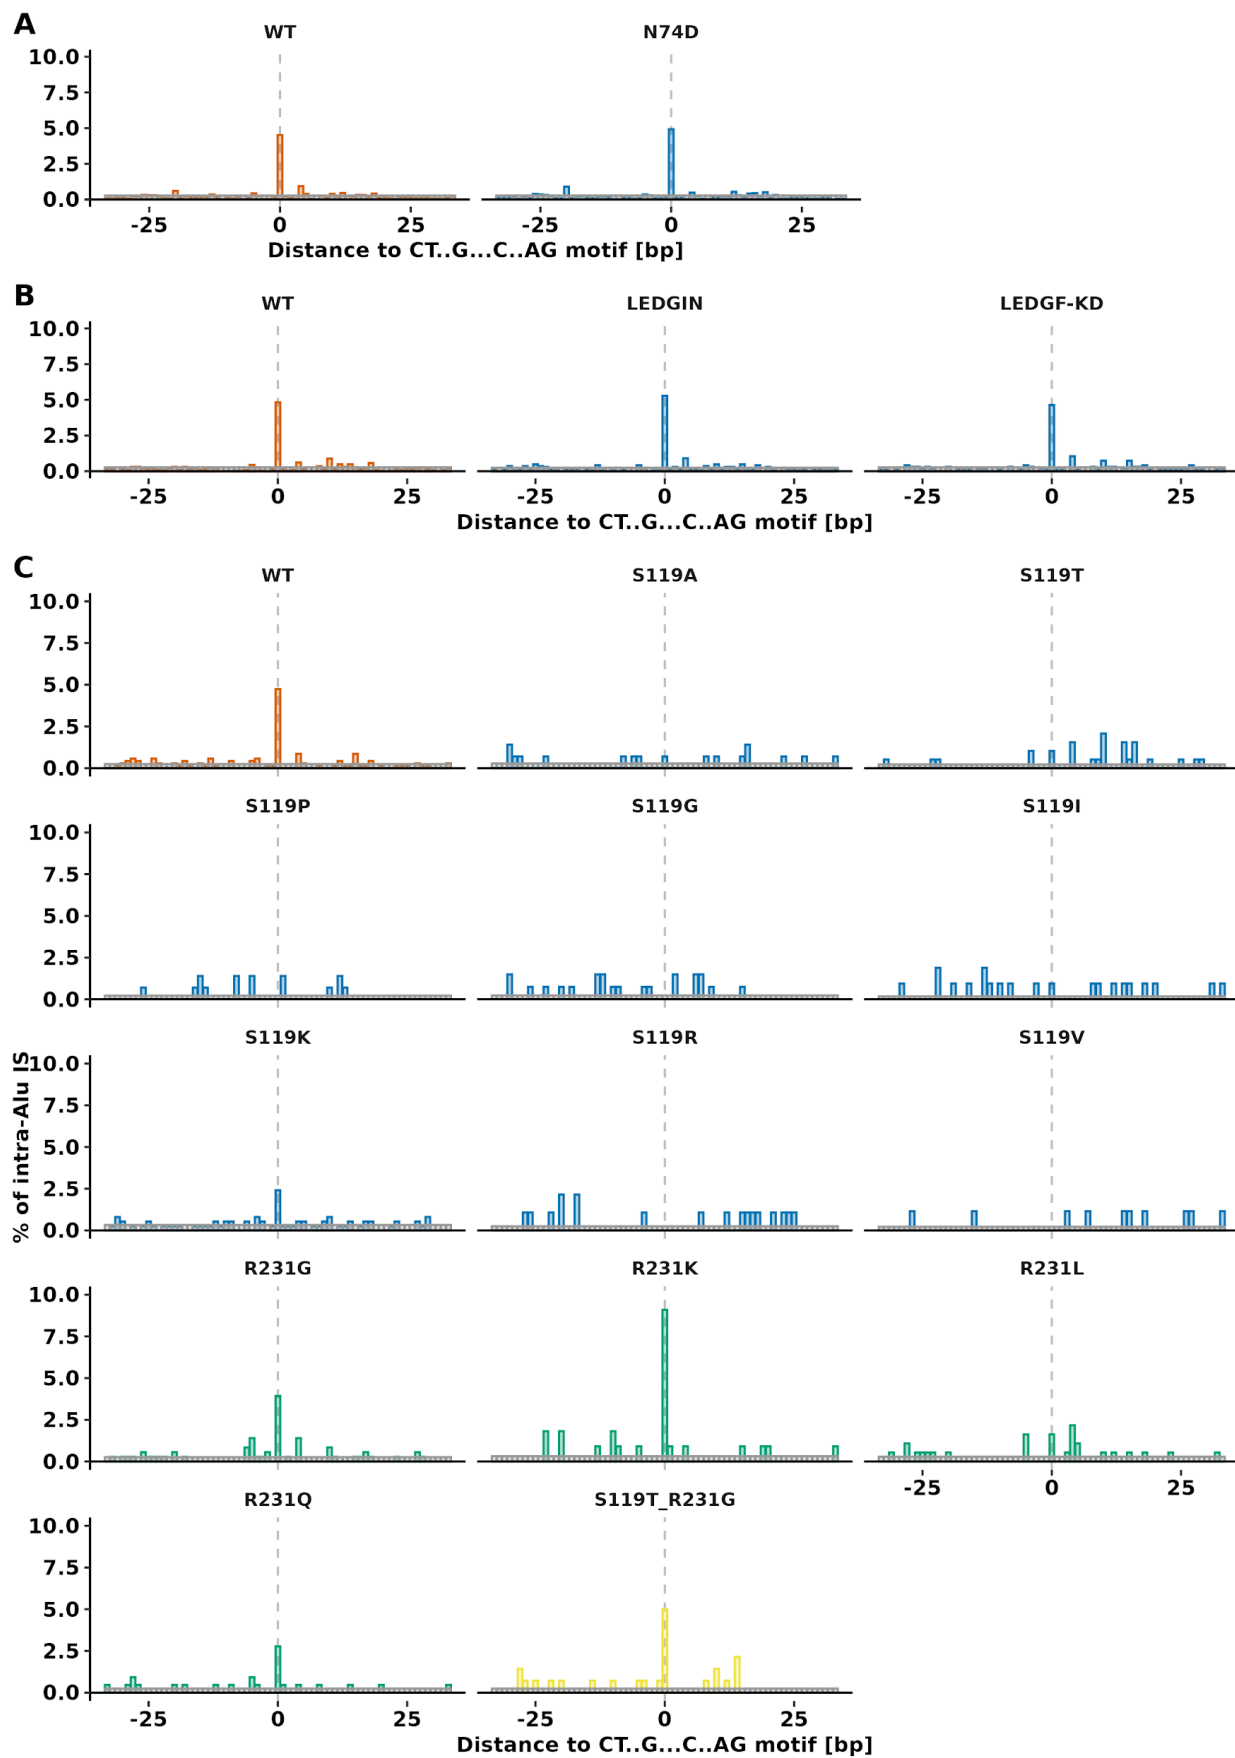



Supplemental Figure 7. Frequency of HIV intra-Alu IS in palindromic CT..G...C..AG motif. Frequency intra-Alu IS inside and in close proximity to CT..G...C..AG palindromic motif. Gray bars represent the mean frequency of 100 iterations of shuffled controls created for each IS set. Bar plots show the frequency of intra-Alu IS 33 bp down- and upstream to the motif relative to *Alu* repeat orientation. Frequencies are binned by 1 bp. Panels A) and B) show data from IS sets where integration retargeting was achieved by interruption of capsid-CPSF6 A) or IN-LEDGEF/p75 B) interactions. Panel C) shows data from IS sets where mutations of S119 of R231 were introduced to HIV-1 IN. Each set contains its own set of control (wt) with unaffected integration.

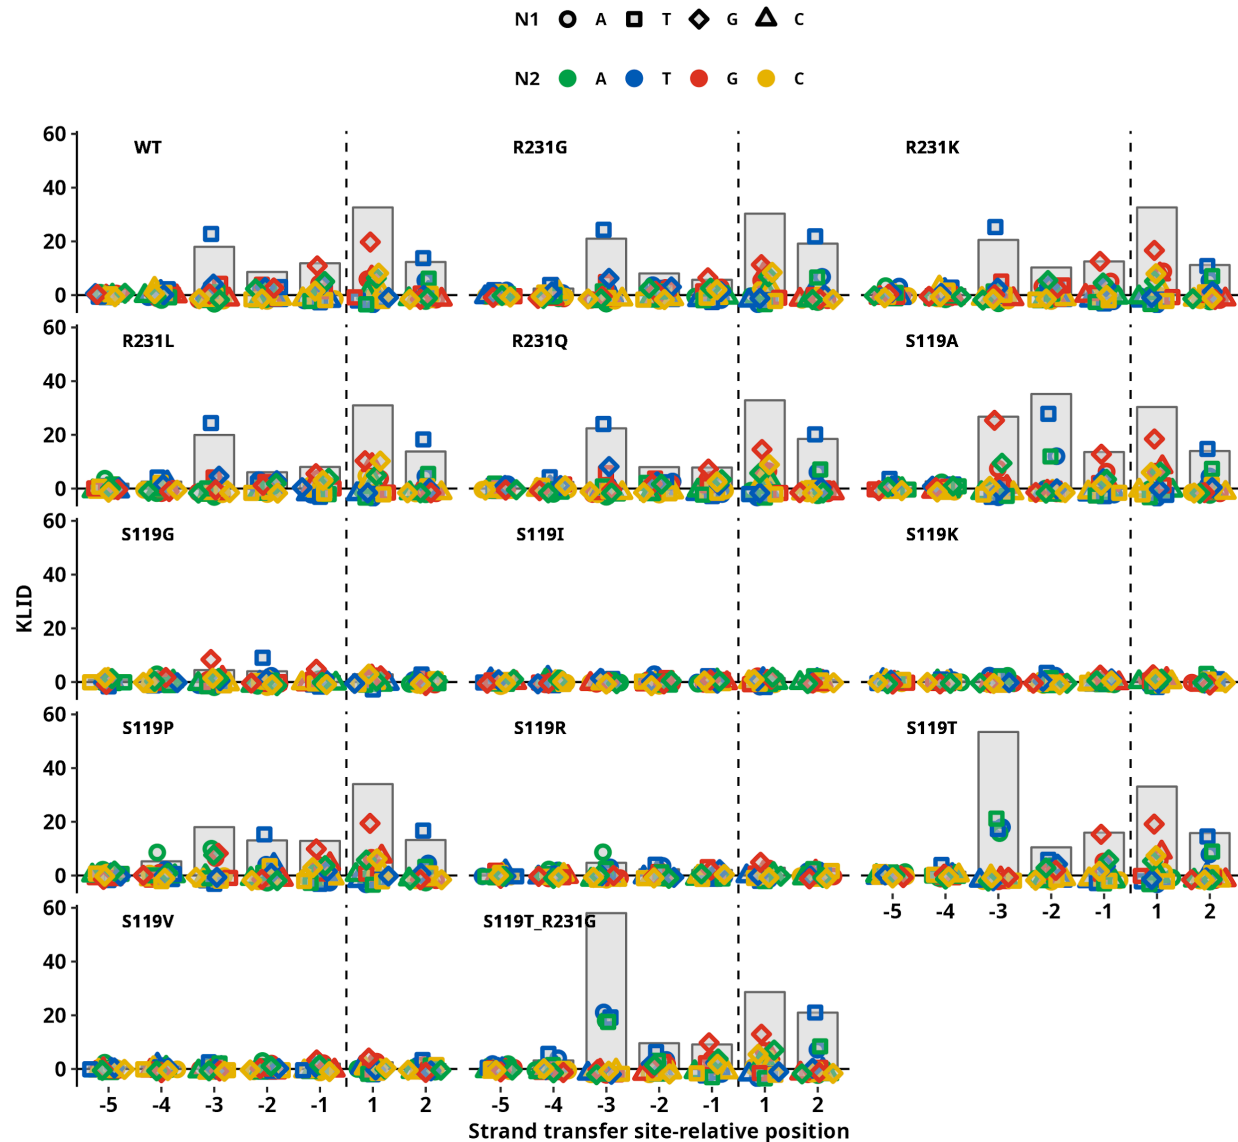

Supplemental Figure 8. KLID representation of enrichment for positional nucleotide combinations of HIV integrase variants. KLID score of dinucleotide combinations at complementary sites marked by position related to the STR site. The position of the STR site is marked by the vertical dashed line. Positions upstream to the STR site are marked with negative values. Gray bars represent the total KLID value at the position. Colored points represent individual contributions of each of the nucleotide combinations. Data from IS sets where mutations of S119 of R231 were introduced to HIV-1 IN.

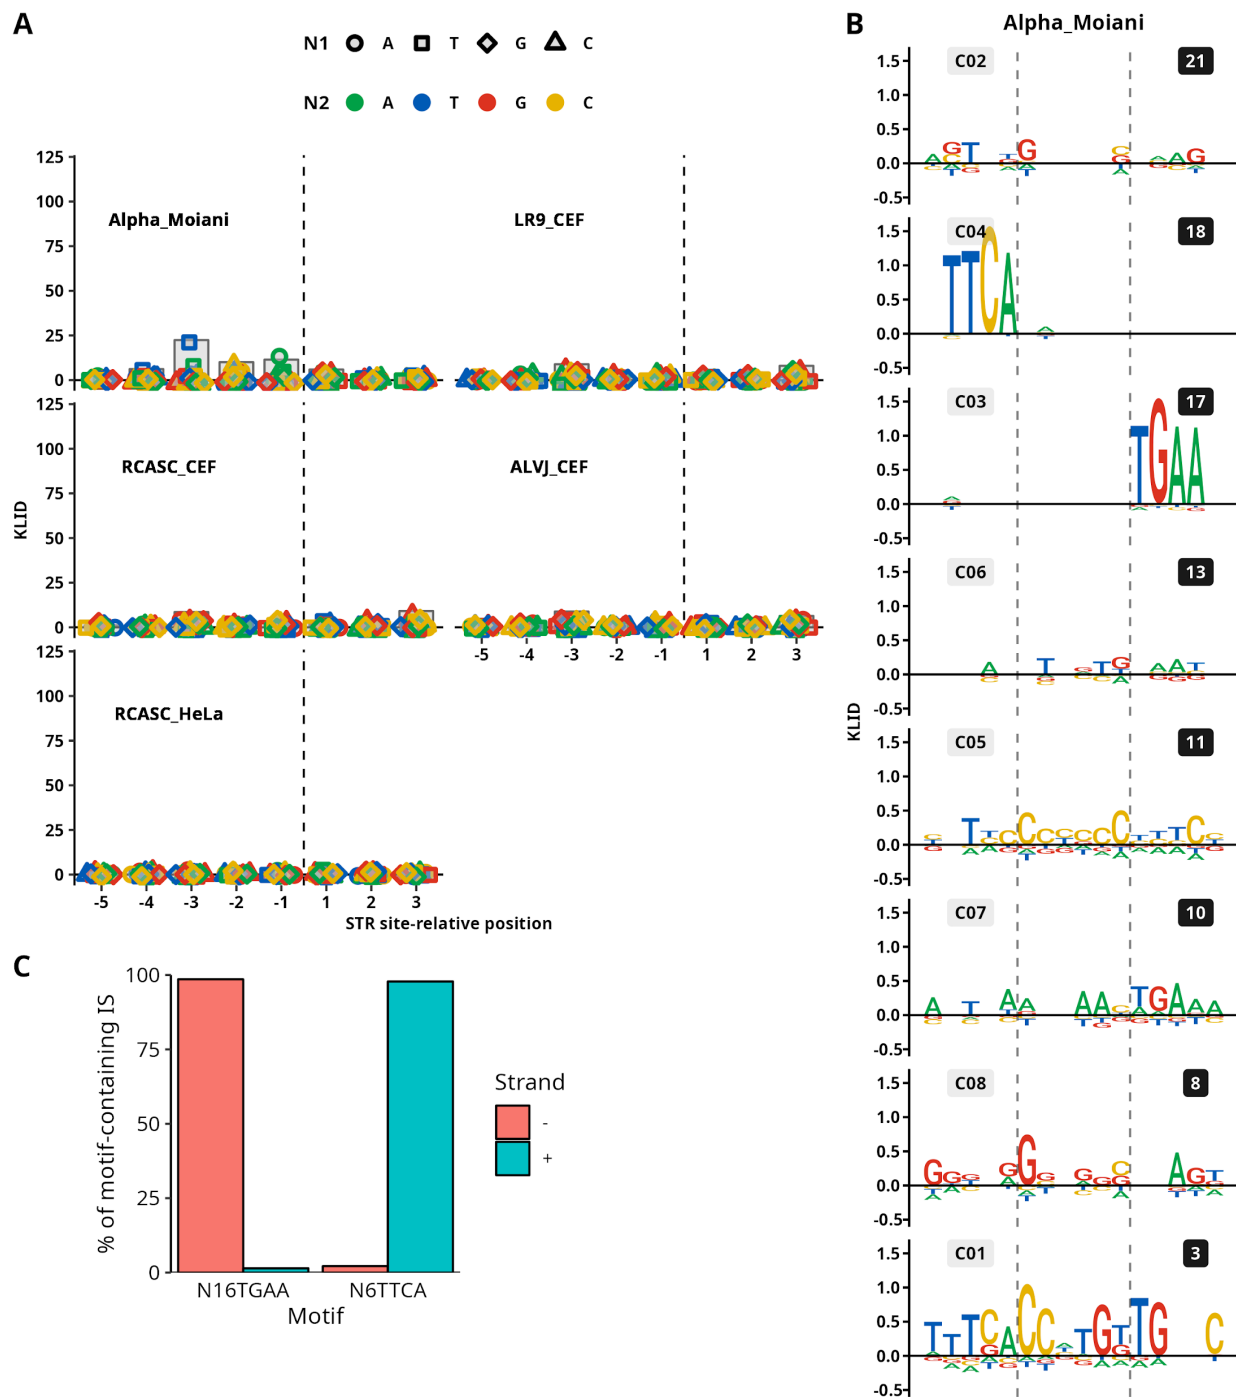

Supplemental Figure 9. Representations of IS sequence preferences of other ASLVs. A) Nucleotide combinations as positional KLID values. The data set named Alpha\_Moiani comes from the publication by Moiani et al. 2014. Other data sets are from the work of Malhotra et al. 2017. Data sets represent distinct retroviruses or retroviral vectors transducing different cells. B) KLID logo representations of the M08 mixture components from the "Alpha\_Moiani" data set. Components C04 and C03 form a reverse-complementary asymmetric pair with high KLID values upstream to the STR site. C) Sequences containing the "N16TGAA" or "N6TTCA" motif proximal to the STR site were identified in the IS data set (number represents the number of nucleotides preceding the motif). The coordinates of the

motif-containing IS were identified. Surprisingly, the majority of IS of each group motif group was mapped to either strand of the reference genome. As this finding might result from some artifact introduced during the data processing, the IS set was omitted from further analysis.

## SUPPLEMENTAL METHODS

### Obtaining coordinates of integration sites (IS)

Retroviral integration sites were obtained from different resources in different formats. The following text describes the procedure leading from the original file to the number-encoded IS sequence file used as input for the EM algorithm.

#### **HTLV**

Sequences of pre-integration genomic sequences were obtained directly from supplemental data of the publication.

#### **HIV**

##### **Zhyvoloup et al. 2017**

IS coordinates were obtained from a publication supplemental table. Replicates of DMSO-treated samples of wt and capsid N74D mutant were joined to create wt and N74D IS sets. Coordinates of both IS sets were joined to create a single file.

##### **Vansant et al. 2020**

Coordinates were obtained from the GSE135295\_ledgins1\_integration\_features table. Mock, LEDGIN+, and LEDGF-KD data sets were created joining bulk, GFP+, and GFP- samples from the same treatment group marked by the key present in field 8 of the feature table as follows: wt (S168, S169, S178), LEDGIN+ (S170, S171, S179), LEDGF-KD (S174, S175, S181).

##### **Demeulemeester et al. 2016**

Coordinates of IS in the form of text files were obtained upon request from the authors of the study. Data obtained by transduction of different cell types with identical variants were mixed. The IS coordinates of the IN variants were transformed to BED format with a custom script.

#### **MLV**

Raw reads were obtained from Sequence Read Archive using the fastq-dump --split-e command.

Sequences were trimmed using cutadapt with the following sequences to be trimmed:

LTR3nest=TGACTACCCGTCAGCGGGGGTC, LTR3rest=TTTCA,

LTR5nest=CAAACCTACAGGTGGGGTCTTTC, LTR5rest=A, Adaptor=AGTCCCTTAAGCGGAGCCCT.

First 5'/3' LTR sequences from primer (LTR\*nest) were trimmed with

*cutadapt -m 11 -O 20 -e 0.1 -j 0 --trim-n*.

The rest of each LTR (LTR\*rest) was trimmed using

*cutadapt -m X -O 20 -e 0 -j 0*,

where the X in -m option equals to LTR\*rest sequence length. The adaptor was removed from sequences using

*cutadapt -m 11 -O 10 -e 0.1 -j 0*.

Finally, sequences containing inner proviral sequences were removed using

*cutadapt -m 11 -O 10 -e 0.1 -j 0*.

The resulting LTR5\_F\_full.fastq and LTR3\_F\_full.fastq were mapped to the hg38 human genome assembly using bowtie2 with *-p 20 -q --no-unal -x hg38* options. Next, alignments of mapped reads were filtered to start at position 0 with *grep -v "MD:Z:0"*. Alignments with a single hit in the genome were then sorted with the *grep -v "XS:i:"* command. The final BED file was created with samtools view, bedtools bamtobed and sort commands.

### **MVV**

BED formatted IS coordinates retrieved from MVV vector-infected HEK293T cells were downloaded from Gene Expression Omnibus (study accession GSE196042).

### **PFV**

BED formatted IS coordinates were downloaded from Gene Expression Omnibus (study accession GSE97973).

### **ASLV**

#### **Malhotra et al. 2017**

SAM formatted alignments were obtained from the authors of the study upon request. First, data from experiments with identical vectors and cells were joined (48h and 120h collection time points). For compatibility with downstream tools, SAM headers from hg19 (HeLa)/galGal4 (CEF) were added to alignments. Next, alignments of mapped reads were filtered to start at position 0 with *grep -v "MD:Z:0"*. Alignments with a single hit in the genome were then sorted with the *grep -v "XS:i:"* command. The final BED file was created with samtools view, bedtools bamtobed, and sort commands. BED ranges were converted to contain single LTR-proximal position with custom awk script:

```
awk '{if ($6 == "+") print $1"\t"$1":"$2_"$6; else print $1"\t"$1":"$3_"$6;}'
```

If the mapped strand was "+", the start coordinate was used, otherwise the end coordinate was used.

The awk command was followed by:

```
sort | uniq -c | awk '{print $3"\t"$1}'
```

to count occurrences of each IS. Only IS coordinates with more than one occurrence were selected for further analysis.

#### **Moiani et al. 2014**

Raw reads were obtained from Sequence Read Archive using the fastq-dump --split-e command.

Sequences were trimmed using cutadapt with the following sequences to be trimmed:

LTR=TTGGTGTGCACCTGGGTTGATGGCCGGACCGTTGATTCCCTGACGACTACGAGCACCTGCAT  
GAAGCAGAAGG

LTRend=^CTTCA

ADAPT=GTCCCTTAAC

MseADAPT=TTAGTCC

First, the majority of LTR sequence was trimmed:

```
cutadapt -g $LTR -m 20 -O 30 -e 0.1 -j 0 --trim-n .
```

Next, the end of LTR was trimmed if the sequence was exactly matching the LTRend:

```
cutadapt -g $LTRend -m 15 -O 5 -e 0 -j 0 .
```

Finally, the adaptor sequence was removed from the reads:

```
cutadapt -a $MseADAPT -m 15 -O 7 -e 0.1 -j 0 .
```

In adapter-containing sequences, the end of the read was modified to contain MseI site instead of the MseI-Adapter junction using sed:

```
sed 's/TTAGTCC$/TTAA/' .
```

The reads were mapped to hg38 genome assembly using bowtie2 with -p 20 parameter set.

In the next step, alignments were filtered using custom code. First, the header of the SAM file was removed with *grep -v "^@"* and only alignments starting at position 0 were selected using *grep -v "MD:Z:0"* and only reads with single alignment were further selected with *grep -v "XS:i:"*. The final BED file was created with SAMtools view, BEDtools bamtobed, and sort commands.

To calculate the frequency of each IS in the IS set, first, the awk was used to convert IS into ISIDs:

```
awk '{if ($6 == "+") print $1"\t"$1":"$2+1_"$6; else print $1"\t"$1":"$3_"$6;}'
```

and then counted with:

```
sort | uniq -c | awk '{print $3"\t"$1}'.
```

IS with at least 5 occurrences were selected and the BED coordinates were transformed to represent the central position of the target site with awk:

```
awk -v tsd=6 'BEGIN{half=tsd/2} {if ($4 == "+") print $1"\t"$2+half-1"\t"$2+half"\t"$4"\t"$5"\t"$6; else print $1"\t"$2-half"\t"$2-half+1"\t"$4"\t"$5"\t"$6}'.
```

### Creating ranges for IS sequences

BED-formatted files containing coordinates of LTR proximal nucleotides were transformed into BED-formatted ranges covering 13 bp to each side from the center of IS (center of the inter-STR area). For this purpose, a custom awk script was used. Owing to the different origin of each IS set, the custom codes may differ and thus individual codes for each IS set is presented. Generally, *tsd* is the length of the target site duplication for a given retrovirus (or floored half of the length for HIV and MLV IS), *dist* is the final length of the sequence and *xtr* is 0 if the length of the target site duplication is even and 1 if the length of the target site duplication is odd. ISFILE is an input file with IS coordinates and output is saved into *OUTFILE.bed* file and sorted using `sort -k 1,1 -k2,2n ${OUTFILE}.bed` for compatibility with downstream tools.

#### HIV

##### **Zhyvoloup et al. 2017**

INVAR is either wt or n74d. This variable selects the virus variant.

```
awk -v tsd=2 -v dist=26 -v xtr=1 -v invar=$INVAR 'BEGIN{start=(dist/2)+xtr-td; end=tsd+(dist/2)} $5 == invar && $3 == "+" {print $1"\t"$2-start"\t"$2+end"\t"$4"\t"1"\t"$4} ${ISFILE} > ${OUTFILE}.bed
```

```
awk -v tsd=2 -v dist=26 -v xtr=1 -v invar=$INVAR 'BEGIN{start=(dist/2)+xtr+td; end=(dist/2)-td} $5 == invar && $3 == "-" {print $1"\t"$2-start"\t"$2+end"\t"$4"\t"2"\t"$4} ${ISFILE} >> ${OUTFILE}.bed
```

##### **Vansant et al. 2020**

```
awk -v tsd=2 -v dist=26 -v xtr=1 'BEGIN{start=(dist/2)-xtr-td+1+1; end=(dist/2)+xtr+td-1} $6 == "-" {print $1"\t"$2-start"\t"$2+end"\t"$4"\t"$5"\t"$6} ${ISFILE} > ${OUTFILE}.bed
```

```
awk -v tsd=2 -v dist=26 -v xtr=1 'BEGIN{start=(dist/2)+xtr+td+1; end=(dist/2)-td-xtr} $6 == "+" {print $1"\t"$2-start"\t"$2+end"\t"$4"\t"$5"\t"$6} ${ISFILE} >> ${OUTFILE}.bed
```

##### **Demeulemeester et al. 2016**

```
awk -v tsd=2 -v dist=26 -v xtr=1 'BEGIN{start=(dist/2)+xtr-td; end=tsd+(dist/2)} $6 == "+" {print $1"\t"$2-start+1"\t"$2+end+1"\t"$4"\t"1"\t"$4} ${ISFILE} > ${OUTFILE}.bed
```

```
awk -v tsd=2 -v dist=26 -v xtr=1 'BEGIN{start=(dist/2)+xtr+td; end=(dist/2)-td} $6 == "-" {print $1"\t"$2-start"\t"$2+end"\t"$4"\t"2"\t"$4} ${ISFILE} >> ${OUTFILE}.bed
```

#### MLV

```
awk -v tsd=2 -v dist=26 -v xtr=0 'BEGIN{start=(dist/2)+xtr-td; end=(dist/2)-td} {print $1"\t"$2-start"\t"$3+end"\t"$4"\t"1"\t"$4} ${ISFILE} > ${OUTFILE}.bed
```

#### MVV

```
awk -v dist=26 'BEGIN{start=(dist/2)-1; end=(dist/2)+1} {print $1"\t"$2-start"\t"$2+end"\t"$4"\t"1"\t"$6} ${ISFILE} > ${OUTFILE}.bed
```

#### PFV

```
awk -v tsd=4 -v dist=26 -v xtr=0 'BEGIN{start=(dist/2)+xtr; end=(dist/2)} {print $1"\t"$2-start"\t"$3+end-1"\t"$5"\t"1"\t"$4} ${ISFILE} > ${OUTFILE}.bed
```

## **ASLV**

### **Malhotra et al. 2017**

```
awk -v tsd=6 -v dist=26 -v xtr=0 'BEGIN{start=(dist/2)+xtr-td; end=tsd+(dist/2)} $4 == "+" {print  
$1"\t"$2-start"\t"$2+end"\t"$5"\t"1"\t"$5}' ${ISFILE} > ${OUTFILE}.bed  
awk -v tsd=6 -v dist=26 -v xtr=0 'BEGIN{start=(dist/2)+xtr+td; end=(dist/2)-td} $4 == "-" {print  
$1"\t"$2-start"\t"$2+end"\t"$5"\t"2"\t"$5}' ${ISFILE} >> ${OUTFILE}.bed
```

### **Moiani et al. 2014**

```
awk -v tsd=6 -v dist=26 -v xtr=0 'BEGIN{start=(dist/2)+xtr; end=(dist/2)} {print  
$1"\t"$2-start"\t"$3+end-1"\t"$5"\t"1"\t"$4}' ${ISFILE} > ${OUTFILE}.bed
```

## **Obtaining genomic sequences from IS ranges**

BEDtools getfasta tool was used to retrieve genomic sequences. IS BED ranges and FASTA files with sequences of chromosomes served as input. In the resulting FASTA files, all nucleotides were converted to capitals with

```
cat ${ISSEQ}.fa | sed 's/a/A/g' | sed 's/c/C/g' | sed 's/g/G/g' | sed 's/t/T/g' > ${ISSEQ}_CAP.fa ,
```

Where ISSEQ is an output file from the getfasta tool.

The right alignment of the sequences was inspected through the classical sequence logo produced by the ggseqlogo R package.

## **Converting sequences to numeric strings**

To use sequences as input for the EM algorithm, nucleotide sequences needed to be converted to a string of numbers. Thus, each nucleotide was given a numeric code. Sequences in the FASTA file were first converted to a table, where sequences are placed into a single column and each sequence occupies a single row:

```
grep -v ">" ${ISSEQ}_CAP.fa > ${ISSEQ}_is26.txt .
```

Finally, the sequences were converted to numeric strings:

```
sed 's/[Aa]/1/g' ${ISSEQ}_is26.txt | sed 's/[Cc]/2/g' | sed 's/[Gg]/3/g' | sed 's/[Tt]/4/g' | sed 's/[Nn]/5/g'  
${ISSEQ}_is26_num.txt
```
