# Supplementary material for: Unraveling the palindromic and nonpalindromic motifs of retroviral integration site sequences by statistical mixture models
Source: HighWire-hosted journal article supplement (doi:10.1101/gr.277694.123), 2023-07-18
Supplement: Supplementary_Material2.zip [file IS_info.xlsx]

## Sheet: Sources
Virus	Variant	Cells	genome	#IS	Publication	Source
ASLV	RCASC	CEF	galGal4	2096	Malhotra et al. 2017	upon request
ASLV	ALVJ	CEF	galGal4	1956	Malhotra et al. 2017	upon request
ASLV	LR9	CEF	galGal4	1210	Malhotra et al. 2017	upon request
ASLV	RCASC	HeLa	hg19	837	Malhotra et al. 2017	upon request
ASLV	alpha	Human CD34+	hg38	1239	Moiani et al. 2014	SRR1282019
HIV-1	wt	SupT1	hg18	6530	Demeulemeester et al. 2014	upon request
HIV-1	R231G	SupT1/HeLaP4	hg18	4897	Demeulemeester et al. 2014	upon request
HIV-1	R231K	SupT1	hg18	1098	Demeulemeester et al. 2014	upon request
HIV-1	R231L	SupT1/HeLaP4	hg18	2314	Demeulemeester et al. 2014	upon request
HIV-1	R231Q	SupT1	hg18	2438	Demeulemeester et al. 2014	upon request
HIV-1	S119A	SupT1	hg18	1549	Demeulemeester et al. 2014	upon request
HIV-1	S119G	SupT1	hg18	1225	Demeulemeester et al. 2014	upon request
HIV-1	S119I	SupT1	hg18	1092	Demeulemeester et al. 2014	upon request
HIV-1	S119K	SupT1	hg18	4682	Demeulemeester et al. 2014	upon request
HIV-1	S119P	SupT1	hg18	1369	Demeulemeester et al. 2014	upon request
HIV-1	S119R	SupT1	hg18	1132	Demeulemeester et al. 2014	upon request
HIV-1	S119T	SupT1	hg18	2066	Demeulemeester et al. 2014	upon request
HIV-1	S119T_R231G	SupT1	hg18	2467	Demeulemeester et al. 2014	upon request
HIV-1	S119V	SupT1	hg18	1173	Demeulemeester et al. 2014	upon request
HIV-1	wt	SupT1	hg19	16803	Vansant et al. 2020	GSE135295
HIV-1	wt (LEDGIN+)	SupT1	hg19	15683	Vansant et al. 2020	GSE135295
HIV-1	wt (LEDGF-KD)	SupT1	hg19	9069	Vansant et al. 2020	GSE135295
HIV-1	wt	Jurkat	hg38	161470	Zhyvoloup et al. 2017	publication
HIV-1	N74D	Jurkat	hg38	63156	Zhyvoloup et al. 2017	publication
HTLV-1	wt	Jurkat	hg19	4521	Kirk et al. 2016	publication
MLV	wt	Human CD34+	hg38	57991	De Ravin et al. 2014	SRR1145702
MVV	wt	HEK293T	hg38	411721	Ballandras-Colas et al 2022	GSE196040
PFV	wt	HT1080	hg38	55384	Lesbats et al. 2017	GSM2584469
PFV	wt	in vitro	hg38	4226638	Lesbats et al. 2017	GSM2584468

## Sheet: Alu_motif
Study	Variant	IS / Shuffle control	IS count	intra Alu	CT..G...C..AG	CT..G...C..AG of Alu	CT..G...C..AG of total
Zhyvoloup	wt	Shuffle	161533	16927	26.5	0.00156555	0.000164053
Zhyvoloup	wt	IS	161533	20690	930	0.0449493	0.00575734
Zhyvoloup	N74D	Shuffle	63156	6568	5	0.000761267	7.9169e-05
Zhyvoloup	N74D	IS	63156	3108	153	0.0492278	0.00242257
Vansant	wt	Shuffle	16803	1855	1	0.000539084	5.95132e-05
Vansant	wt	IS	16803	2262	109	0.0481874	0.00648694
Vansant	LEDGIN	Shuffle	15683	1664	3	0.00180288	0.00019129
Vansant	LEDGIN	IS	15683	1652	87	0.0526634	0.00554741
Vansant	LEDGF-KD	Shuffle	9069	897	1	0.00111483	0.000110266
Vansant	LEDGF-KD	IS	9069	952	44	0.0462185	0.00485169
Demeulemeester	WT	Shuffle	6530	652	0.5	0.000766871	7.65697e-05
Demeulemeester	WT	IS	6530	697	33	0.0473458	0.0050536
Demeulemeester	S119A	Shuffle	1549	156	0.5	0.00320513	0.000322789
Demeulemeester	S119A	IS	1549	144	1	0.00694444	0.000645578
Demeulemeester	S119T	Shuffle	2066	208	0	0	0
Demeulemeester	S119T	IS	2066	194	2	0.0103093	0.000968054
Demeulemeester	S119T_R231G	Shuffle	2467	249	0	0	0
Demeulemeester	S119T_R231G	IS	2467	140	7	0.05	0.00283745
Demeulemeester	R231G	Shuffle	4897	531	1	0.00188324	0.000204207
Demeulemeester	R231G	IS	4897	357	14	0.0392157	0.00285889
Demeulemeester	R231K	Shuffle	1098	125	0	0	0
Demeulemeester	R231K	IS	1098	110	10	0.0909091	0.00910747
Demeulemeester	R231L	Shuffle	2314	239	0	0	0
Demeulemeester	R231L	IS	2314	184	3	0.0163043	0.00129646
Demeulemeester	R231Q	Shuffle	2438	273	0.5	0.0018315	0.000205086
Demeulemeester	R231Q	IS	2438	216	6	0.0277778	0.00246103
Demeulemeester	S119P	Shuffle	1369	144	NA	NA	NA
Demeulemeester	S119P	IS	1369	143	0	0	0
Demeulemeester	S119G	Shuffle	1225	117	NA	NA	NA
Demeulemeester	S119G	IS	1225	172	0	0	0
Demeulemeester	S119I	Shuffle	1092	100	0	0	0
Demeulemeester	S119I	IS	1092	132	1	0.00757576	0.000915751
Demeulemeester	S119K	Shuffle	4682	469	1	0.0021322	0.000213584
Demeulemeester	S119K	IS	4682	436	9	0.0206422	0.00192226
Demeulemeester	S119R	Shuffle	1132	116	NA	NA	NA
Demeulemeester	S119R	IS	1132	119	0	0	0
Demeulemeester	S119V	Shuffle	1173	112	NA	NA	NA
Demeulemeester	S119V	IS	1173	107	0	0	0
